# Supplementary material for: Principal Component Analysis of RNA-seq Data Unveils a Novel Prostate Cancer-Associated Gene Expression Signature
Source: Preprints.org preprint supplement (doi:10.20944/preprints202102.0234.v1), 2021-02-09

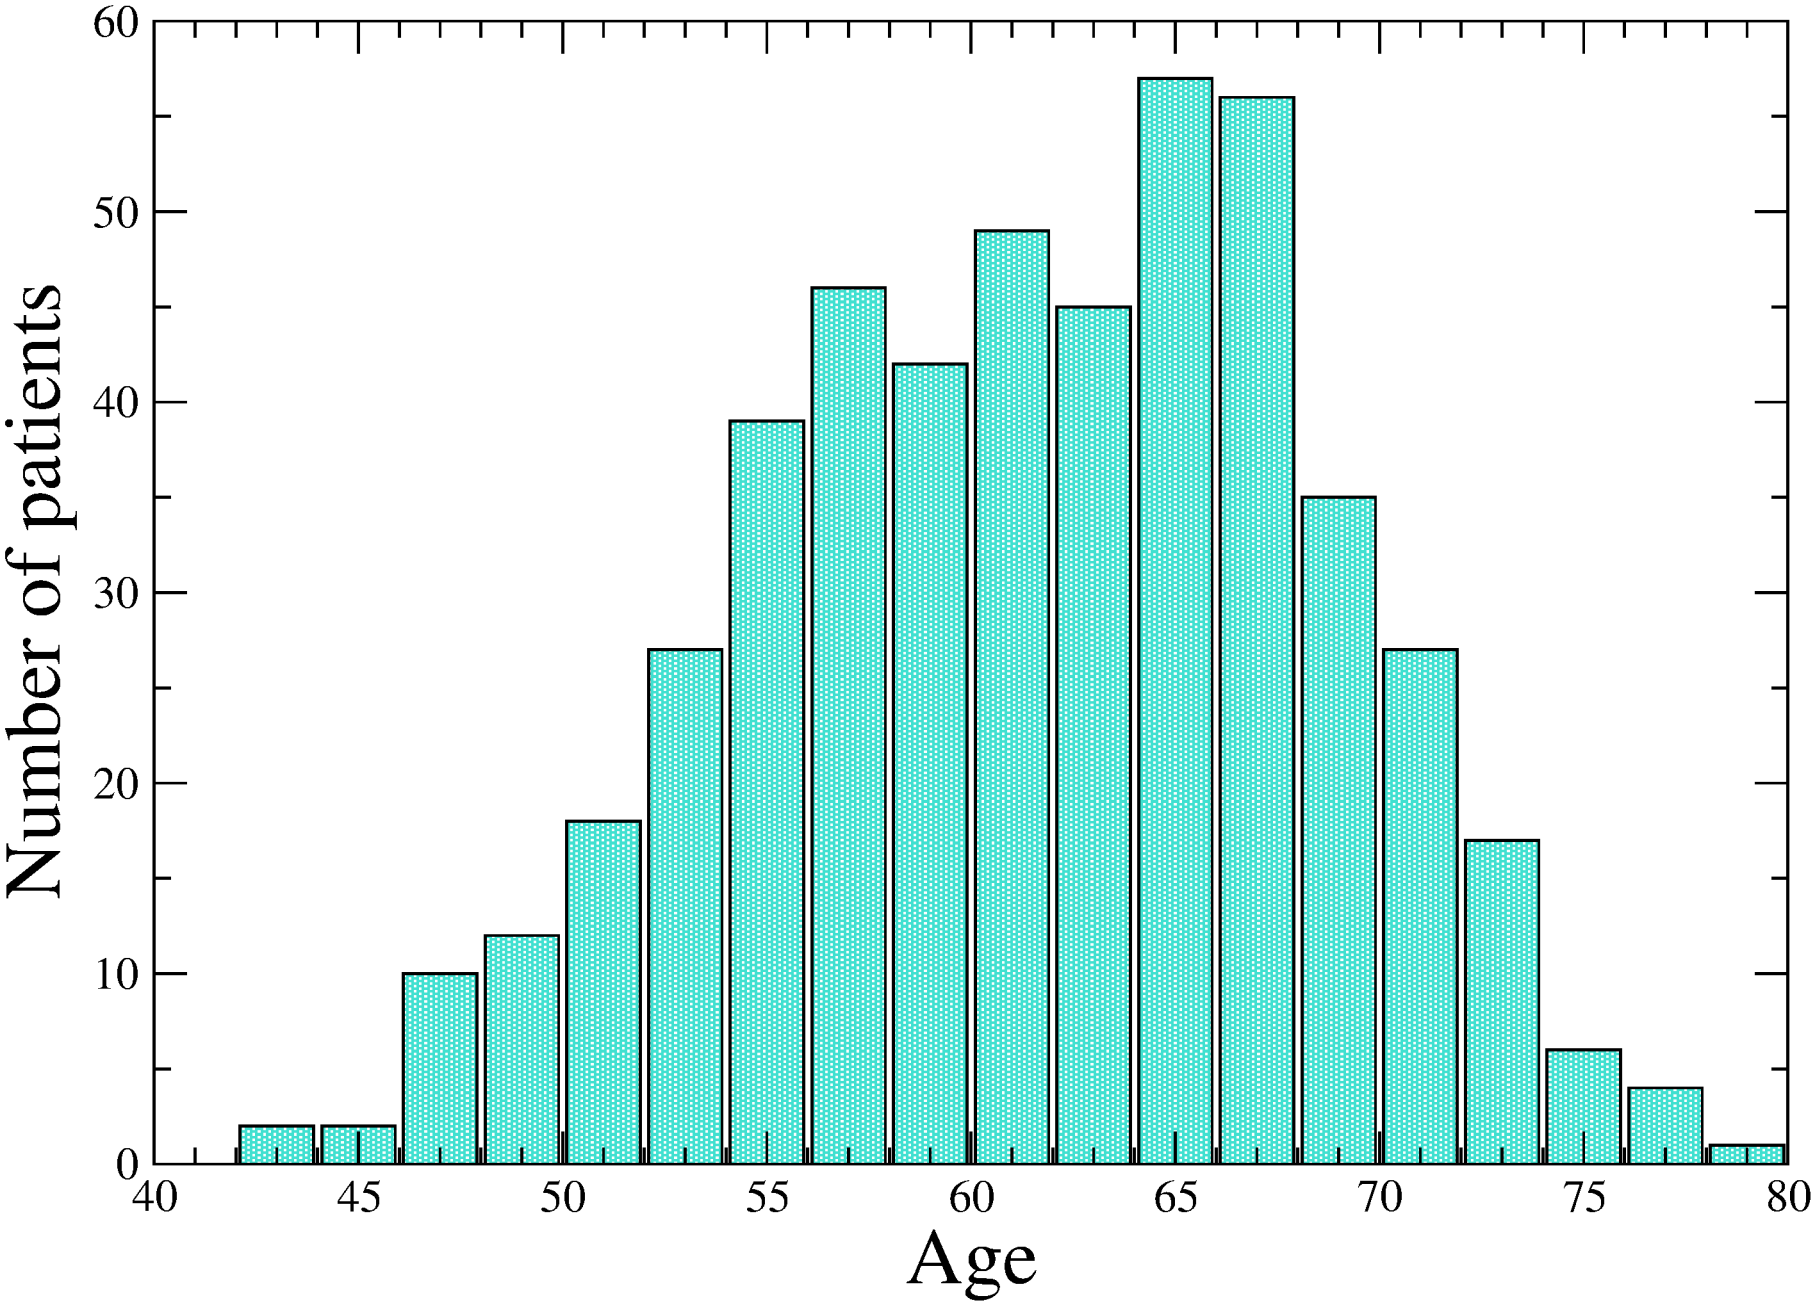

Supplement: Supplementary file [file Supplementary Fig 1.pdf › Supplementary Fig 1.pdf]
