# Supplementary material for: Principal Component Analysis of RNA-seq Data Unveils a Novel Prostate Cancer-Associated Gene Expression Signature
Source: Preprints.org preprint supplement (doi:10.20944/preprints202102.0234.v1), 2021-02-09
Supplement: Supplementary file [file Supplementary Fig 4.pdf › Supplementary Fig 4.pdf]

# Expression of genes of your list in reported primary prostate tumors of radical prostatectomy patients <sup>1,2,3</sup>

1. **Lapointe J**, Li C, Higgins JP, van de Rijn M et al. Gene expression profiling identifies clinically relevant subtypes of prostate cancer. *Proc Natl Acad Sci U S A* 2004 Jan 20;101(3):811-6.
2. **Ross-Adams H**, Lamb AD, Dunning MJ, et al. Integration of copy number and transcriptomics provides risk stratification in prostate cancer: A discovery and validation cohort study. *EBioMedicine*. 2015;2(9):1133–1144.
3. **Taylor BS**, Schultz N, Hieronymus H, et al. Integrative genomic profiling of human prostate cancer. *Cancer Cell*. 2010;18(1):11–22.

## 1- Lapointe dataset

Benign vs. primary tumour vs.  
lymph node metastases

Box plots of z-scores vs. benign,  
with genes presented in the  
same order for all analyses

Statistics: Kruskal-Wallis test  
with Bonferroni correction for  
multiple tests

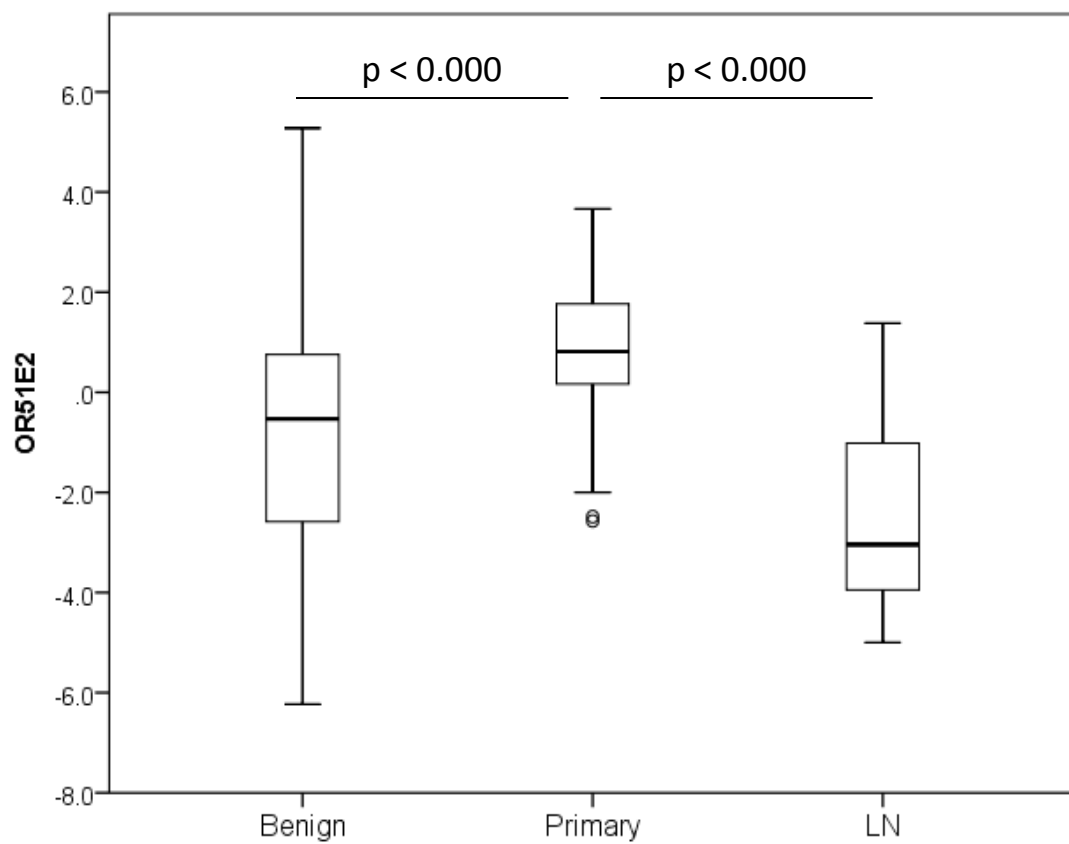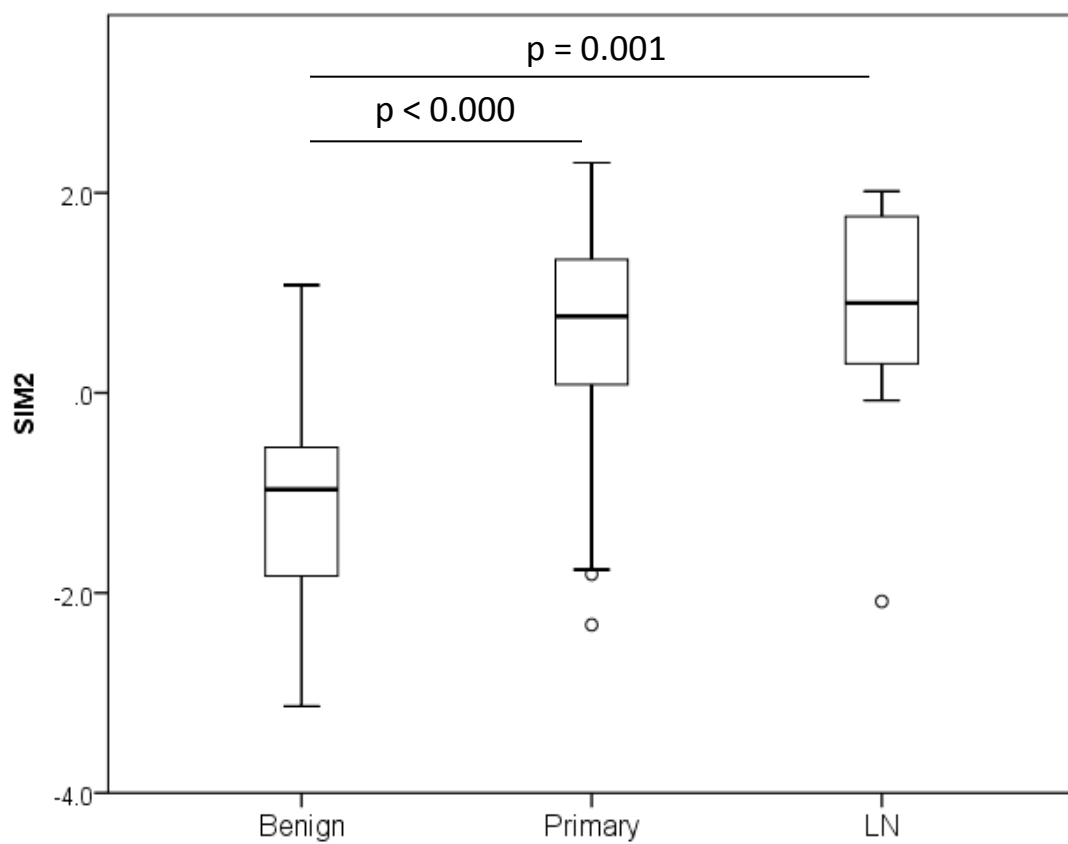

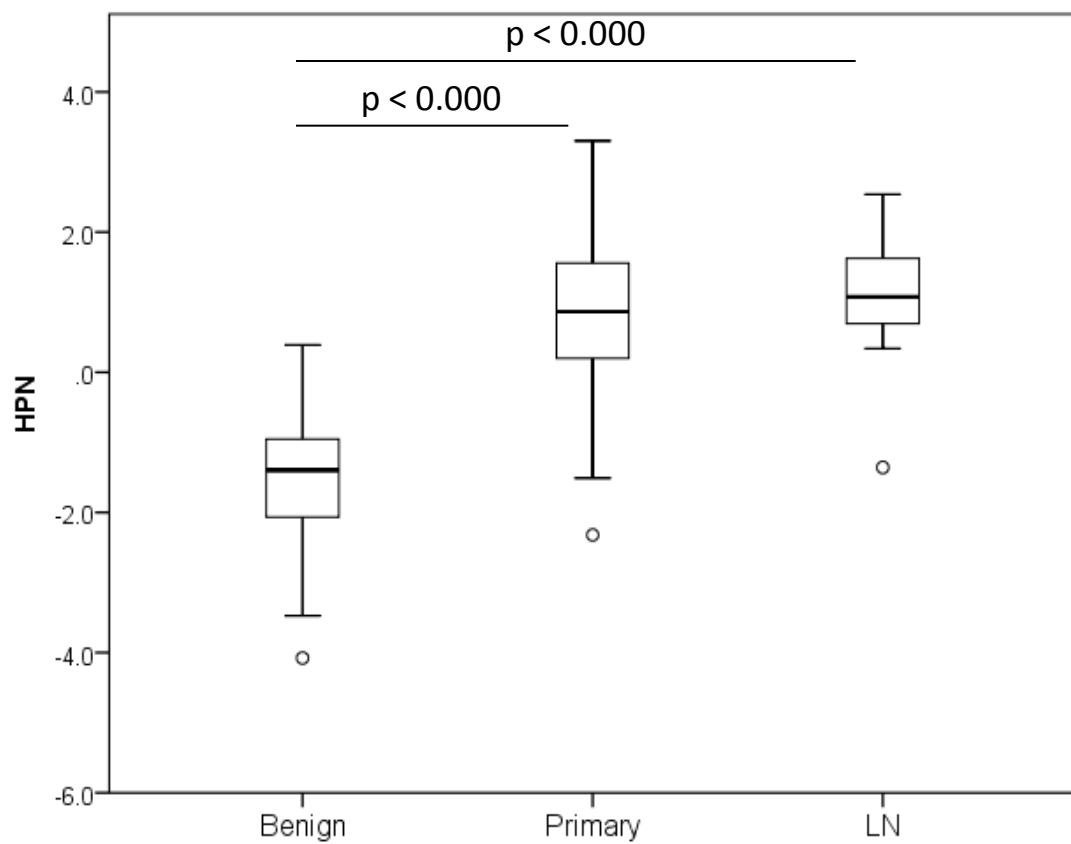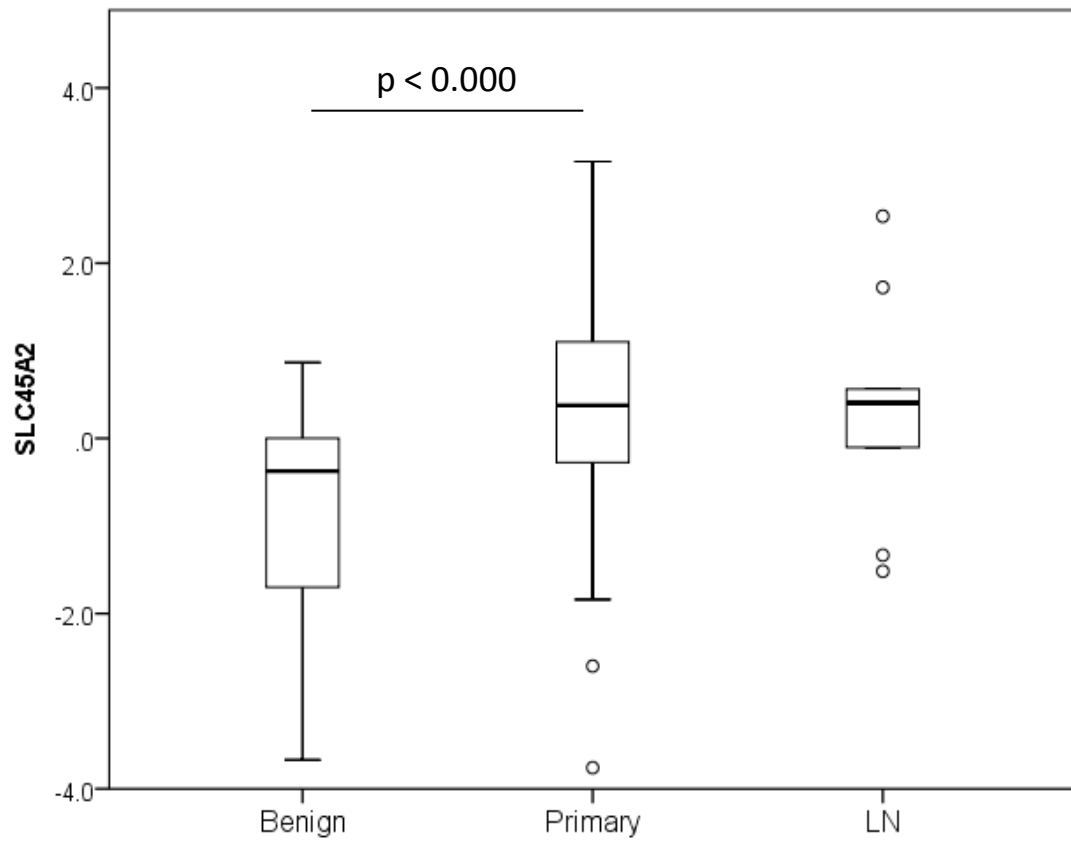

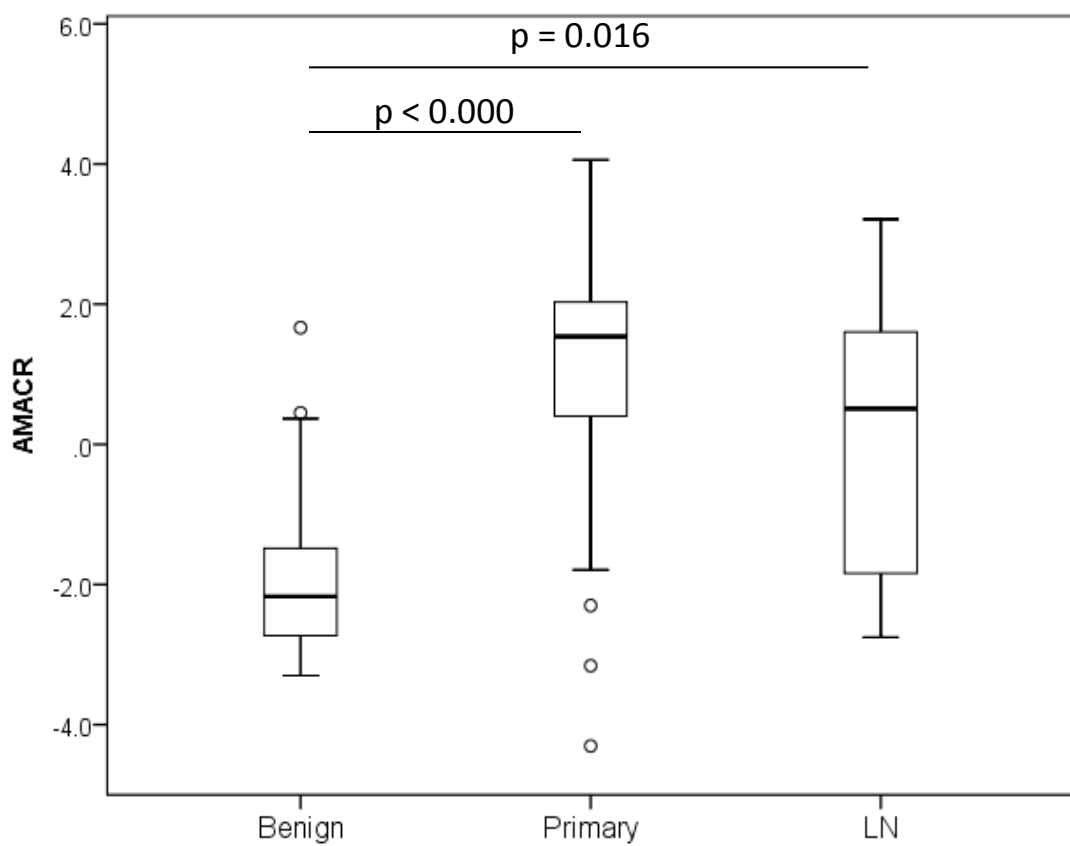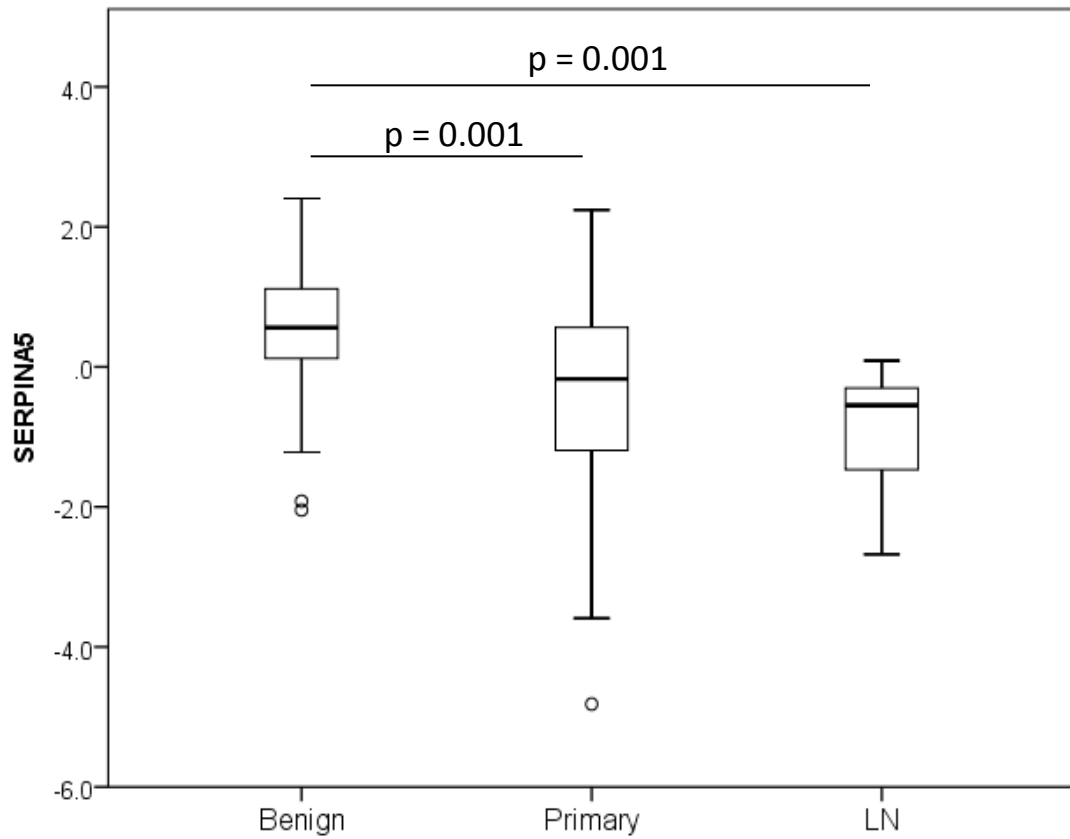

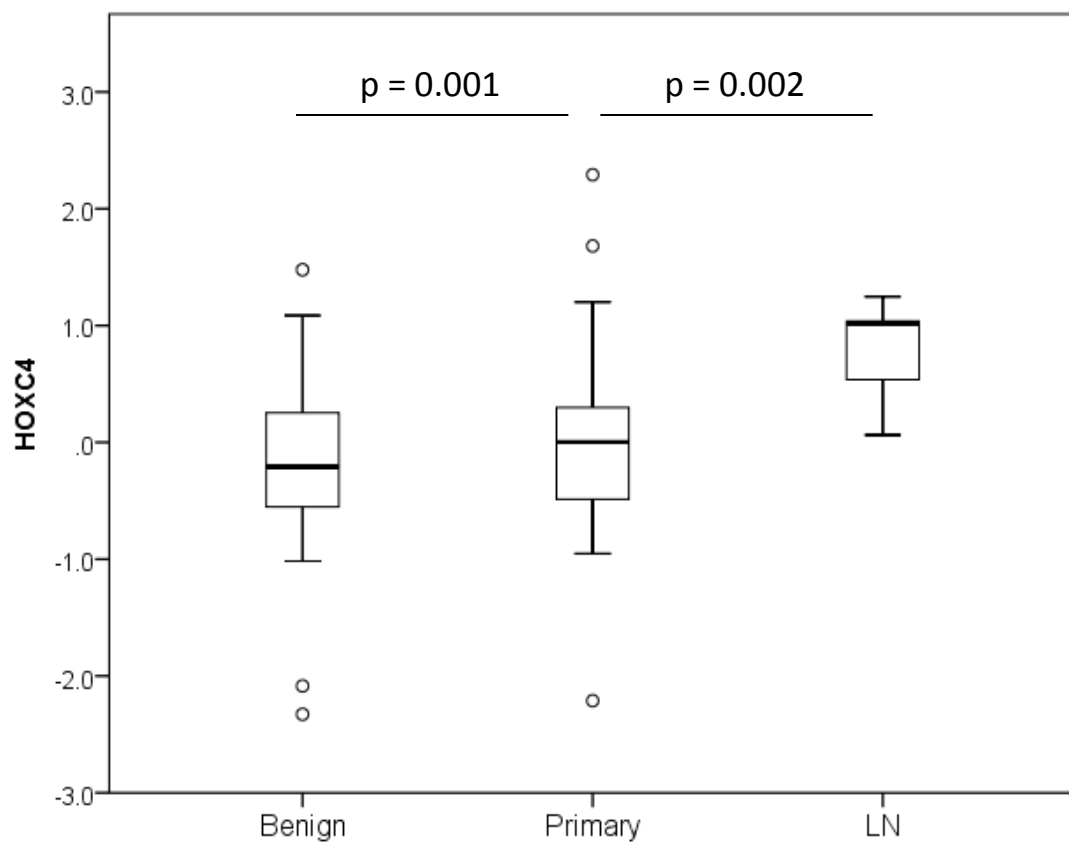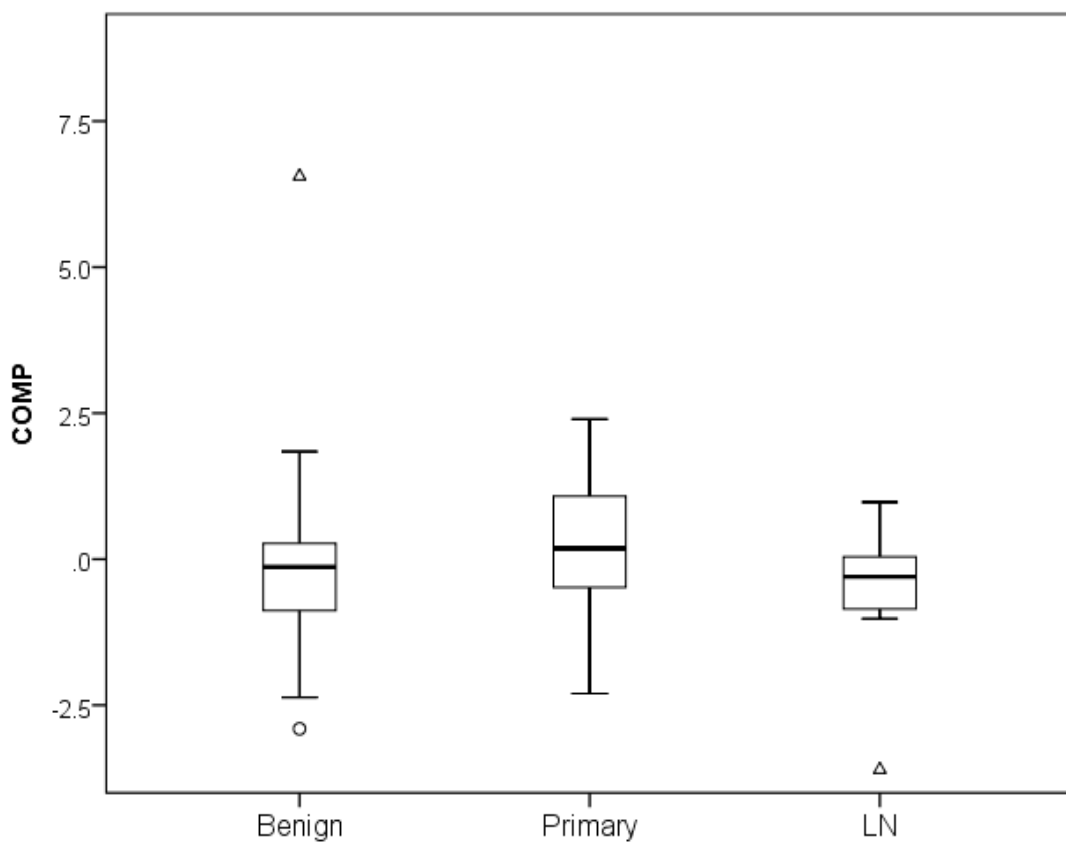

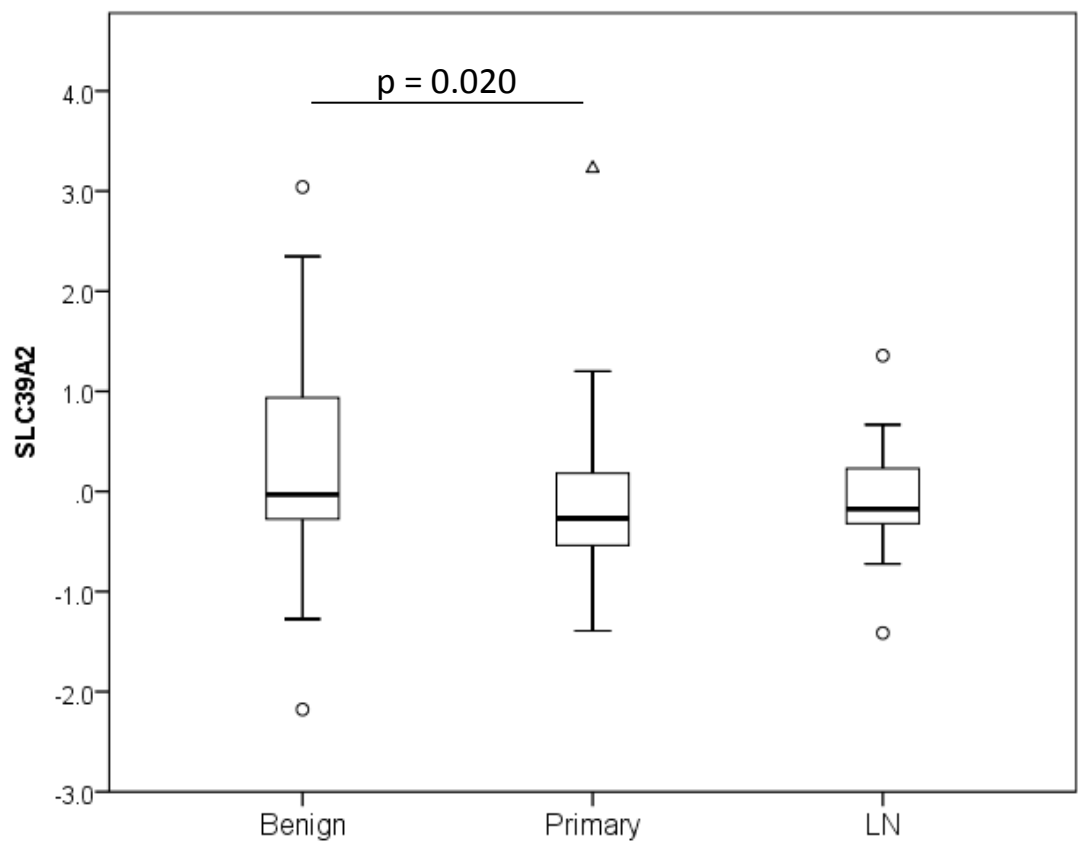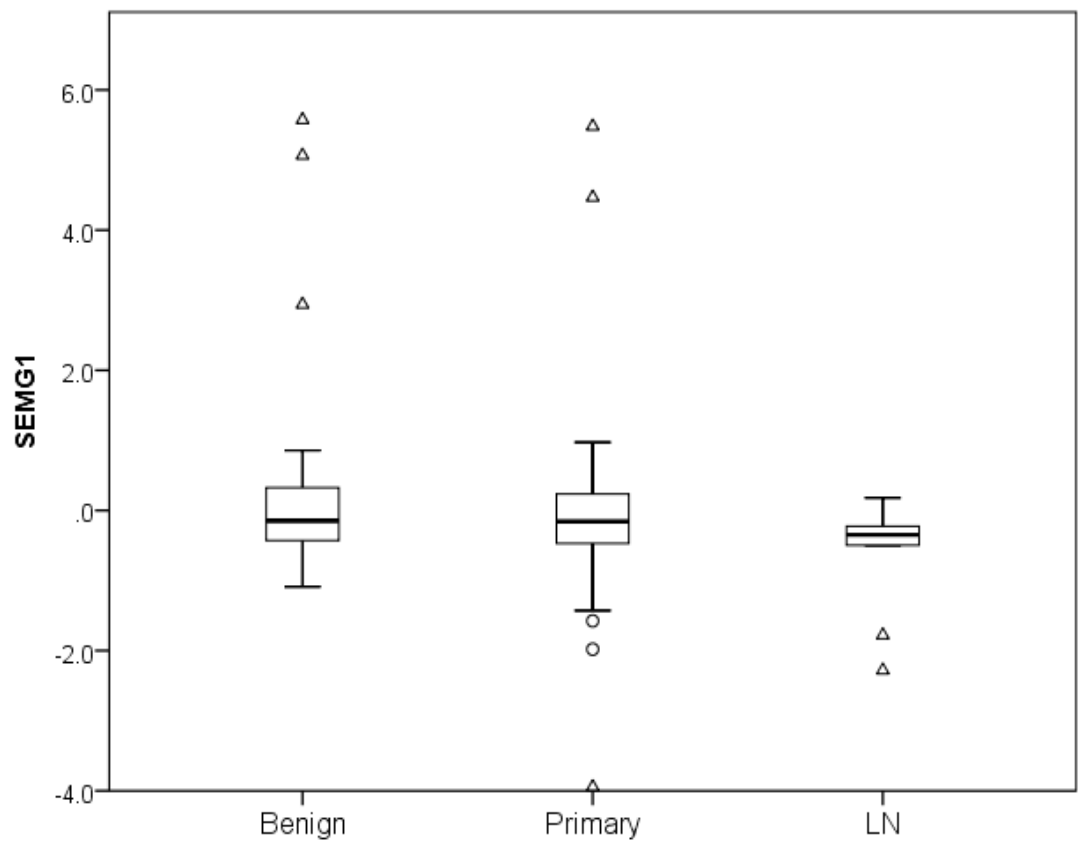

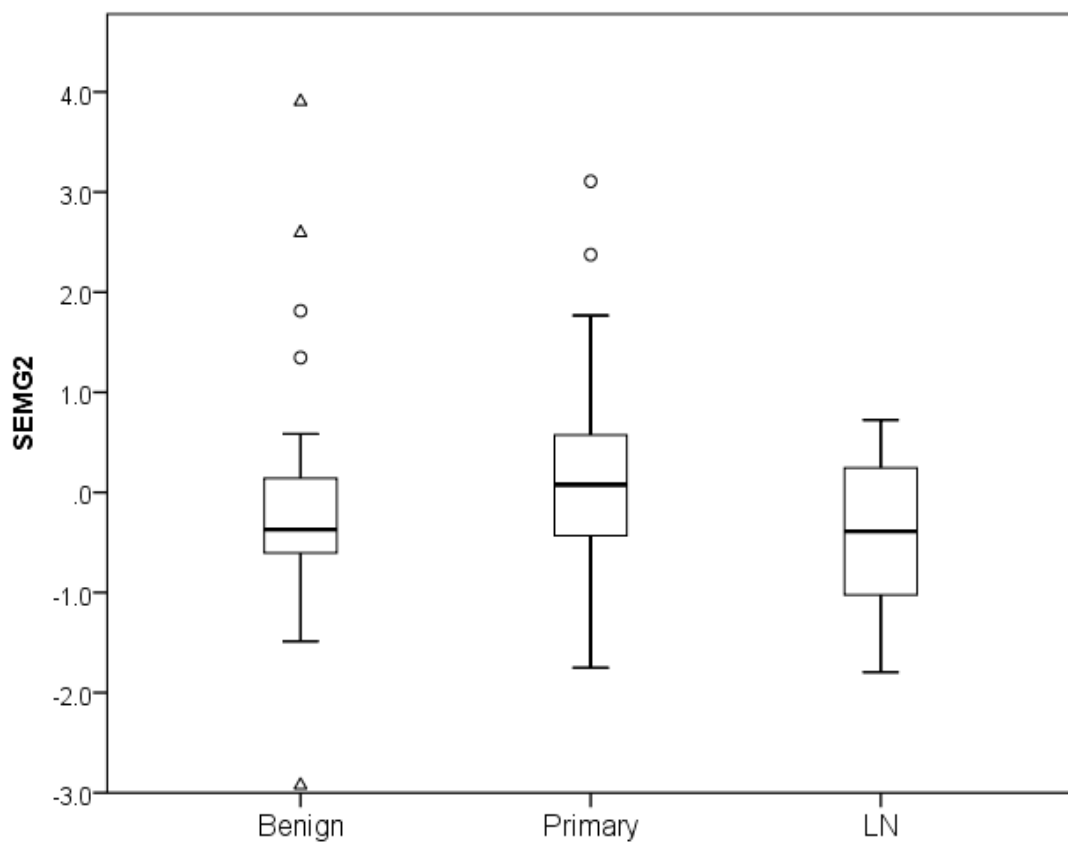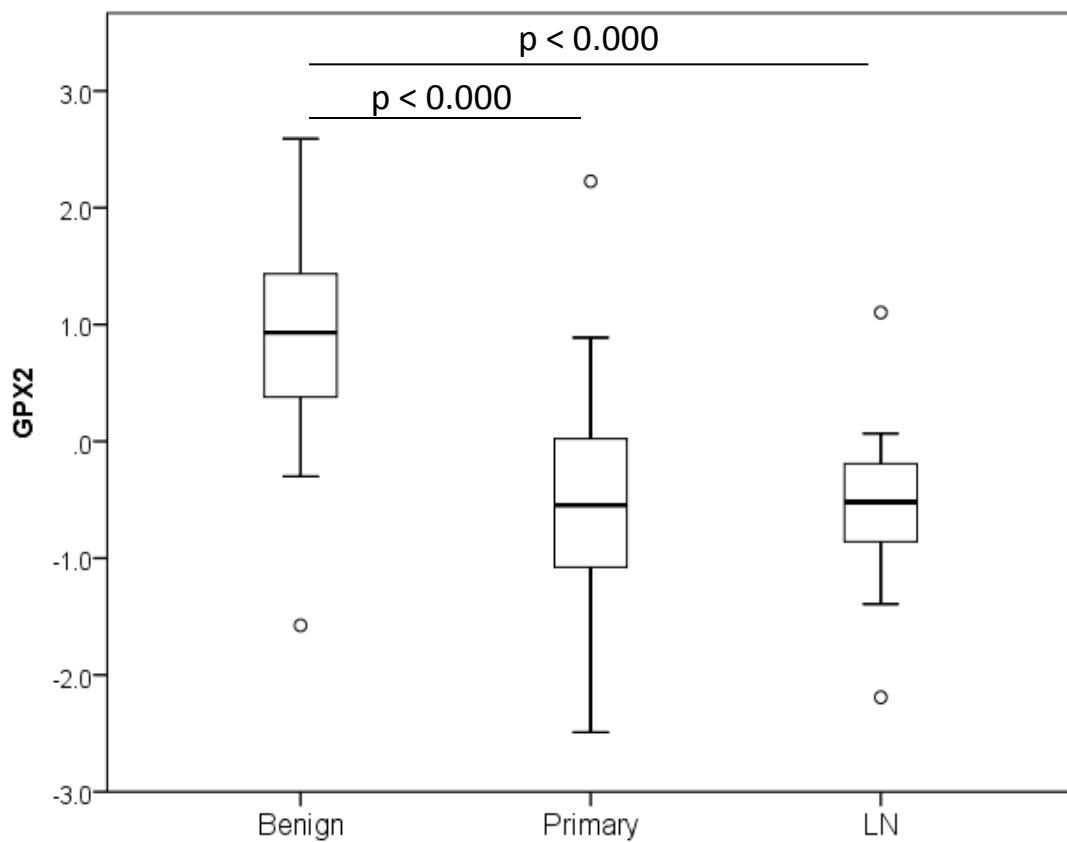



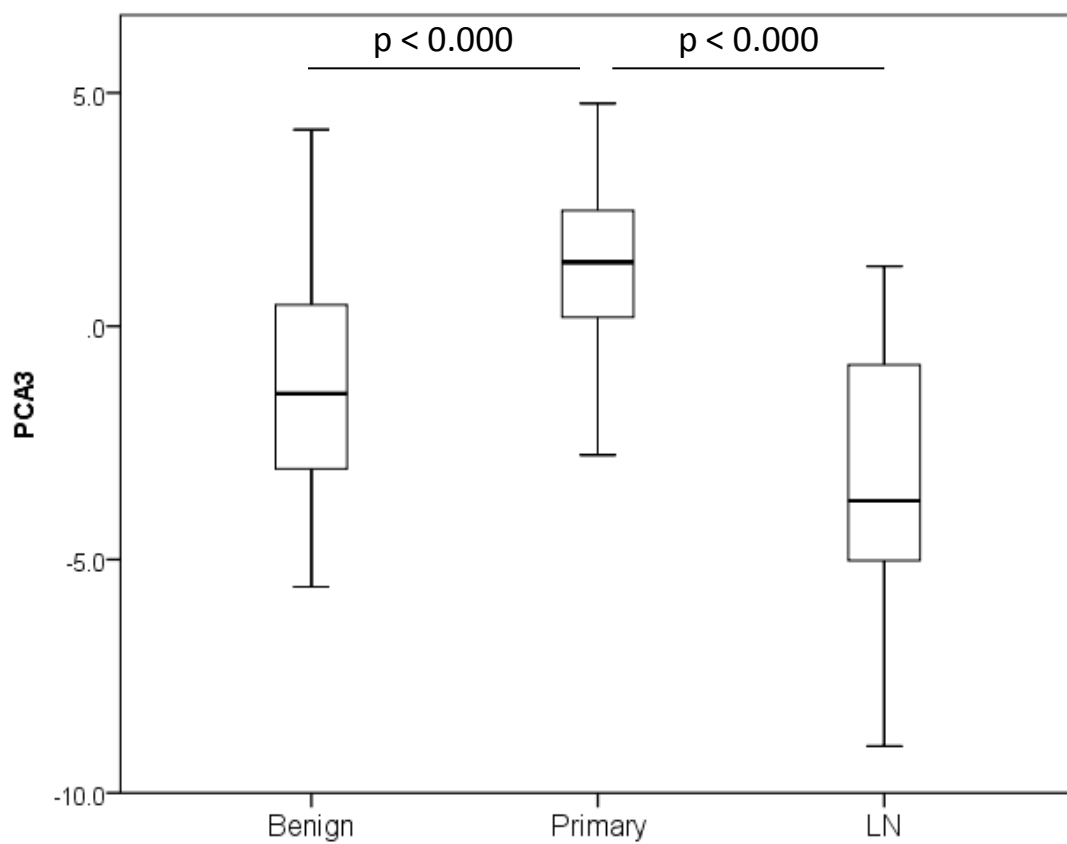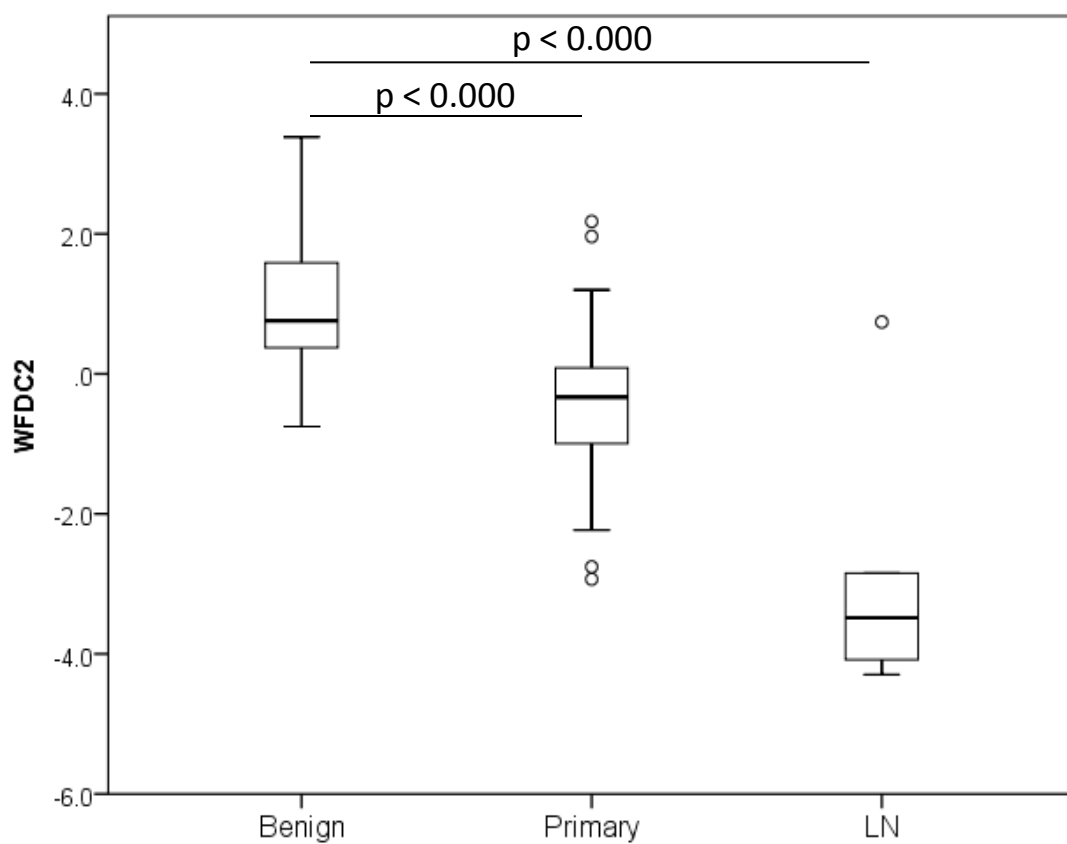

# Lapointe Dataset

## Summary of Results

| P values | Benign vs. Primary | Benign vs. lymph node | Primary vs. Lymph node |
|----------|--------------------|-----------------------|------------------------|
| OR51E2   | <0.000             |                       | <0.000                 |
| SIM2     | <0.000             | 0.001                 |                        |
| HPN      | <0.000             | <0.000                |                        |
| SLC45A2  | <0.000             |                       |                        |
| AMARC    | <0.000             | 0.016                 |                        |
| SERPINA5 | 0.001              | 0.001                 |                        |
| HOXC4    | 0.001              |                       | 0.002                  |
| COMP     |                    |                       |                        |
| SLC39A2  | 0.020              |                       |                        |
| SEMG1    |                    |                       |                        |
| SEMG2    |                    |                       |                        |
| GPX2     | <0.000             | <0.000                |                        |
| PCA3     | <0.000             |                       | <0.000                 |
| WFDC2    | <0.000             | <0.000                |                        |

**Green:** Upregulation (e.g . High in primary vs. Benign)

**Red:** Downregulation (e.g . Low in primary vs. Benign)

## 2- Ross-Adams dataset

Benign vs. radical  
prostatectomy vs. TURP cases

Statistics: Kruskal-Wallis test  
with Bonferroni correction for  
multiple tests

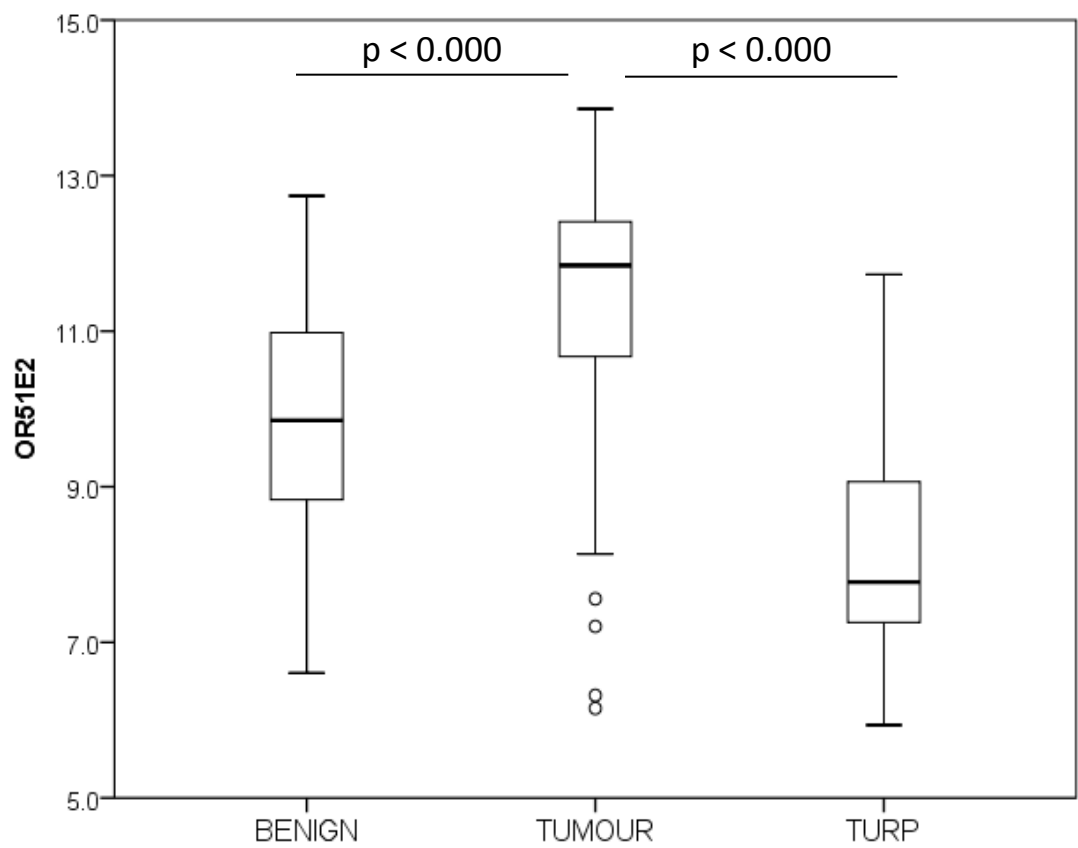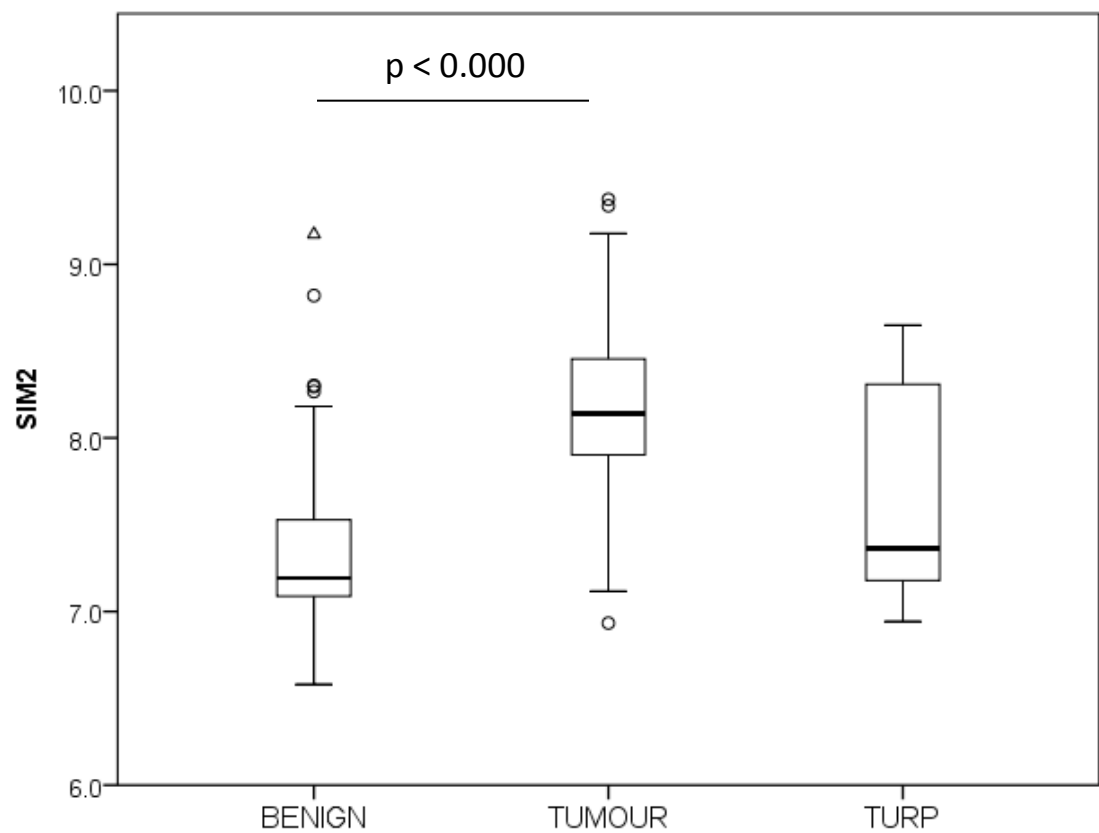

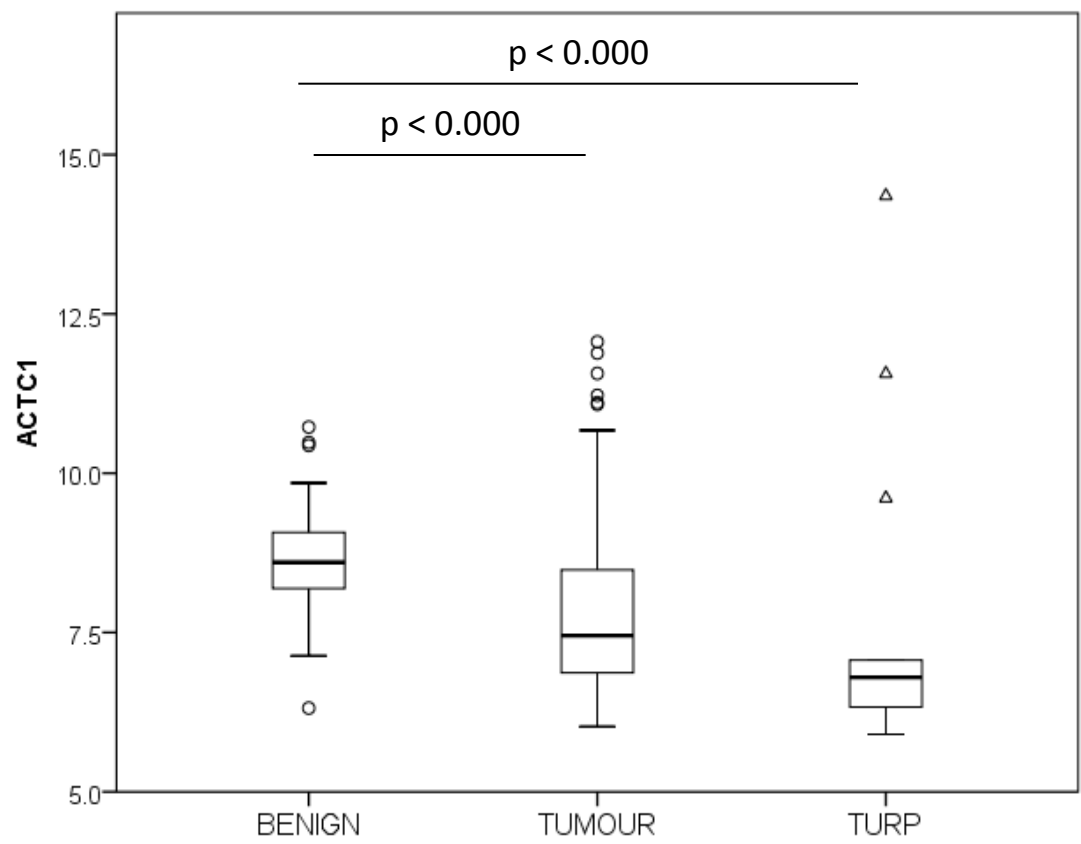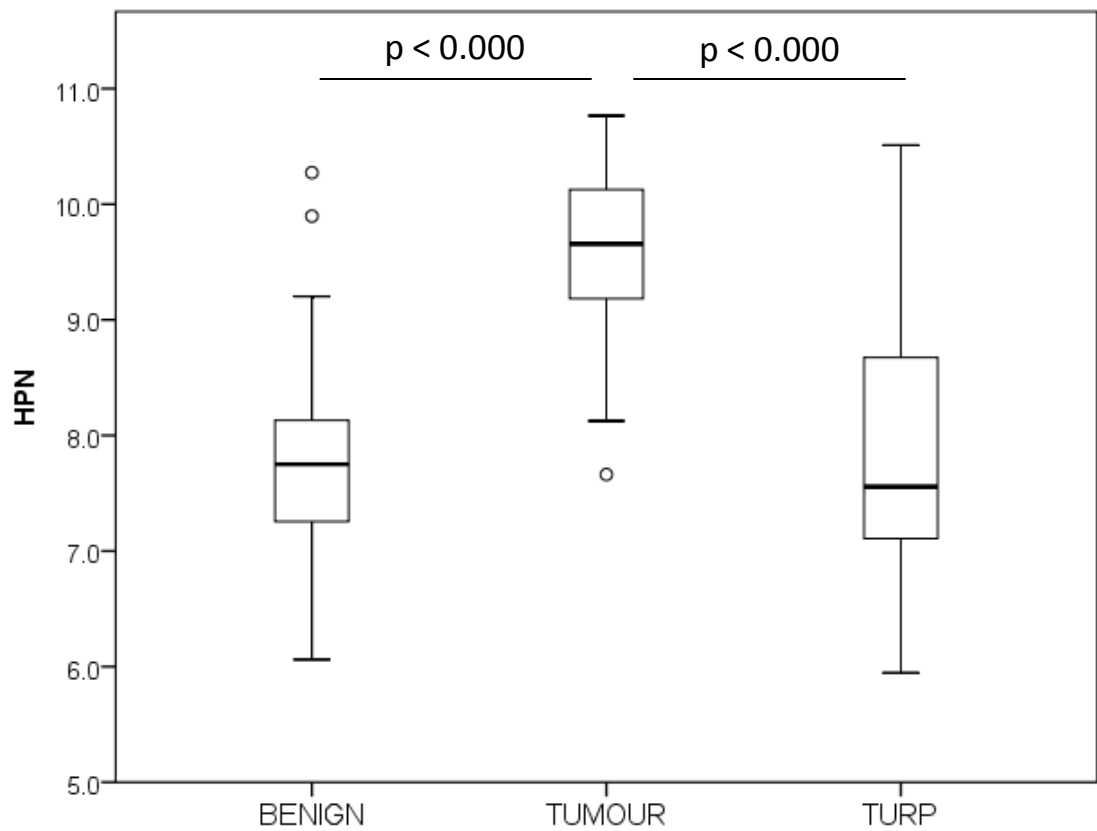

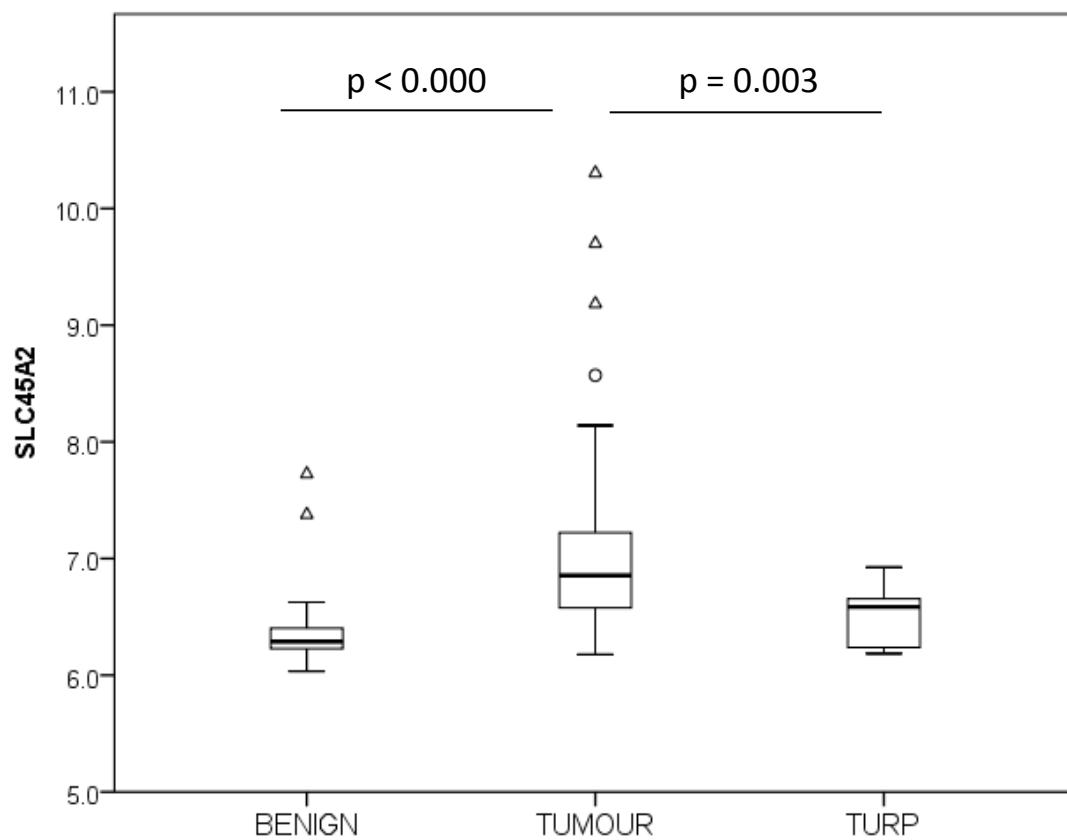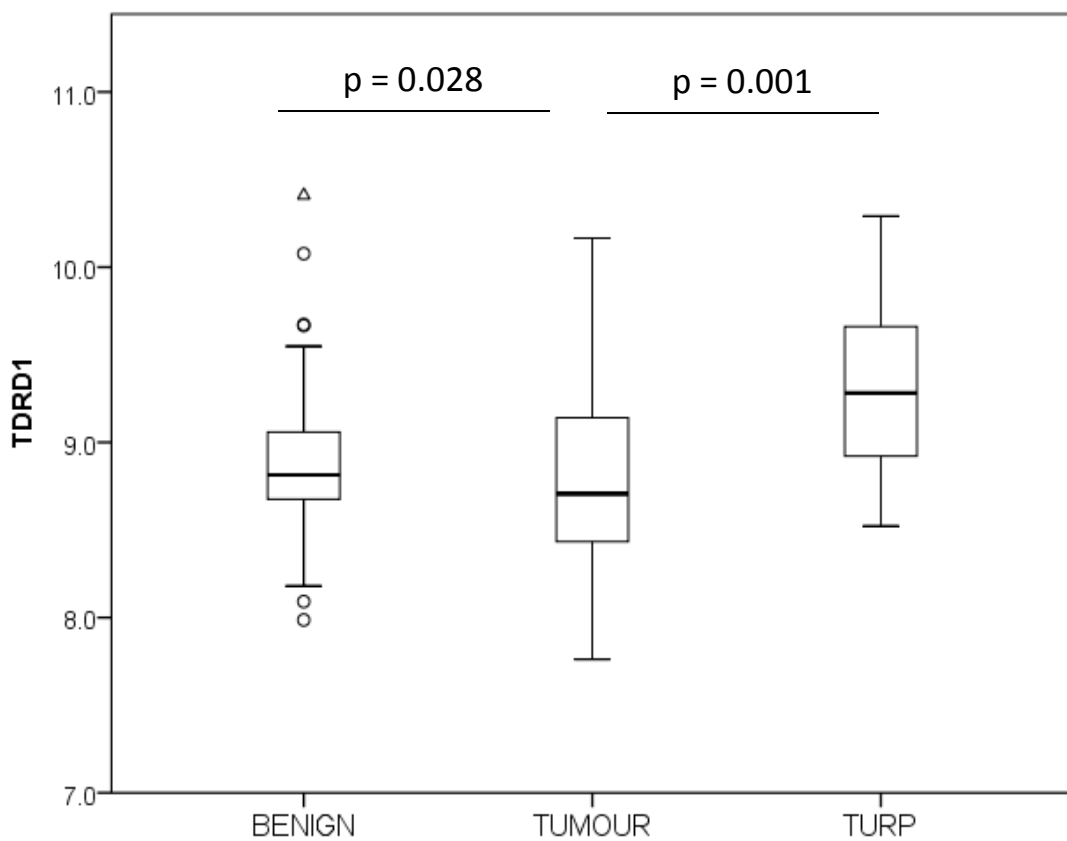

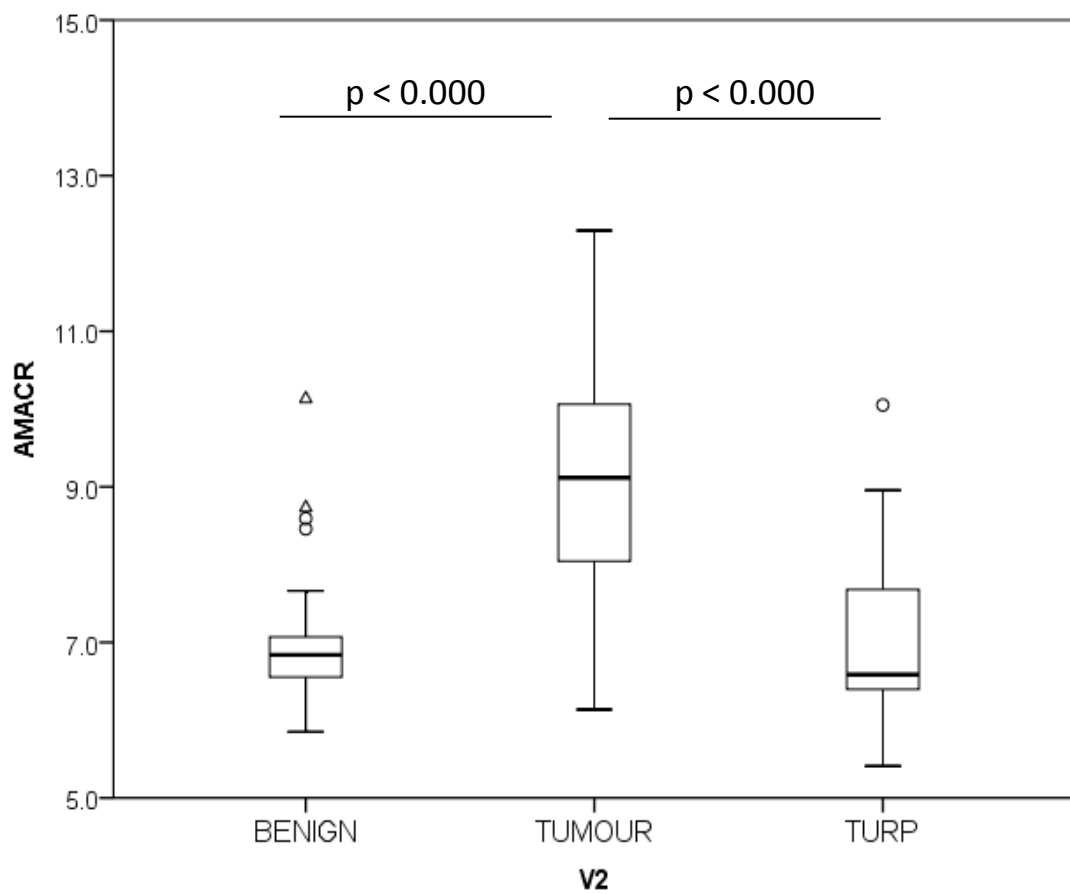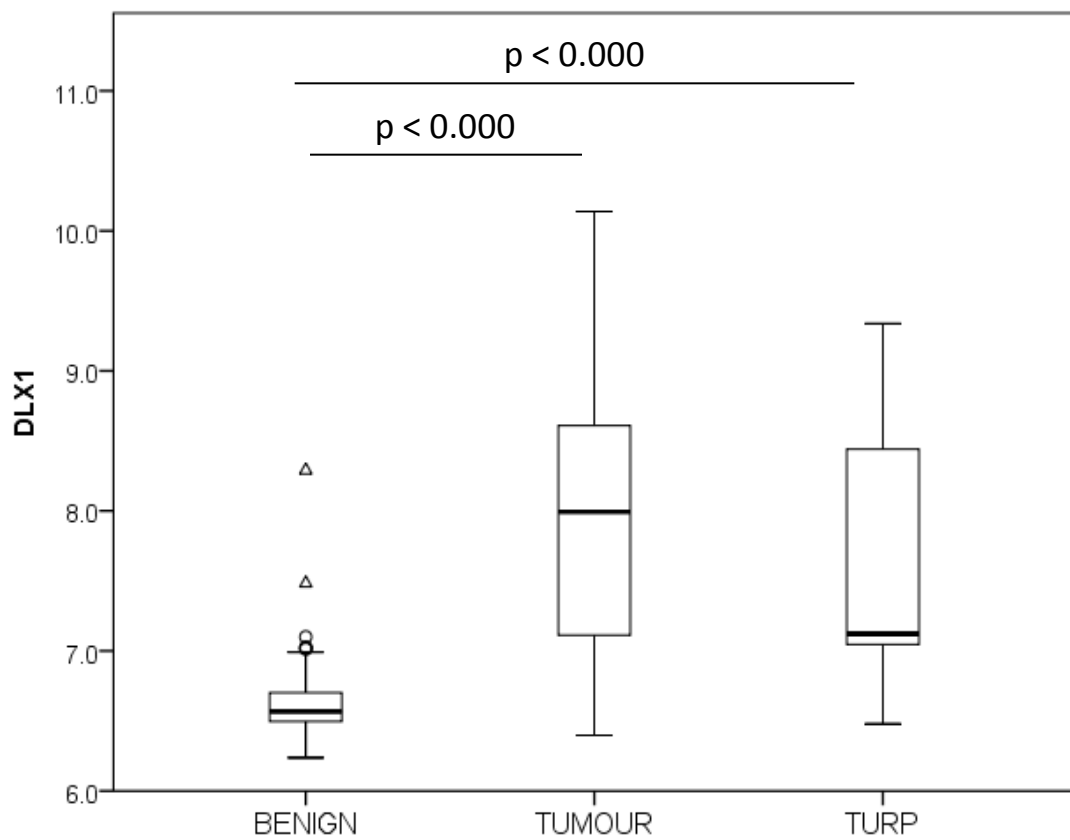

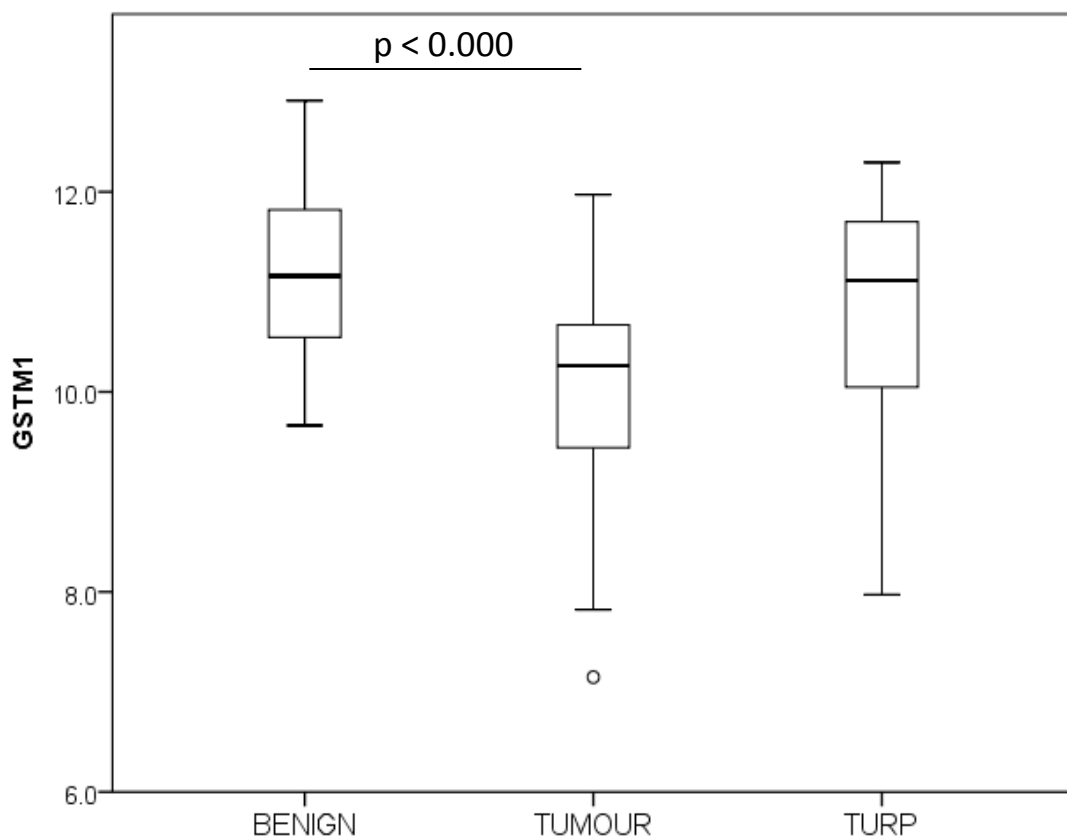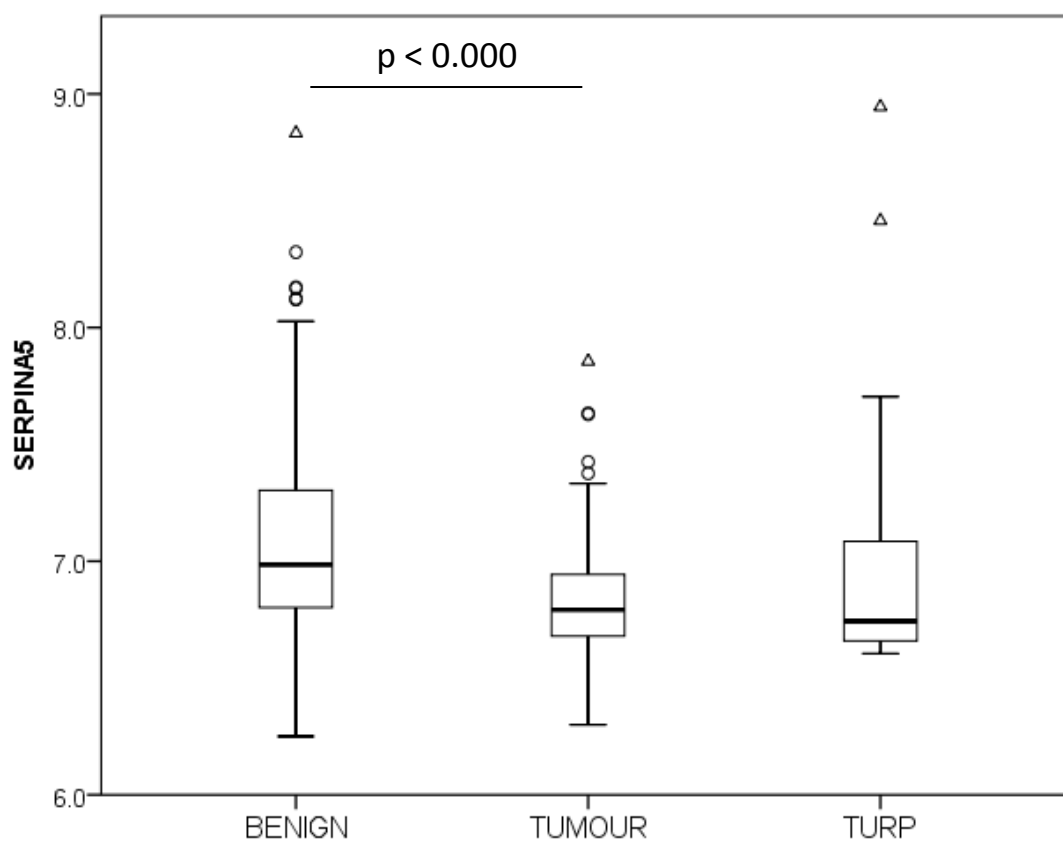



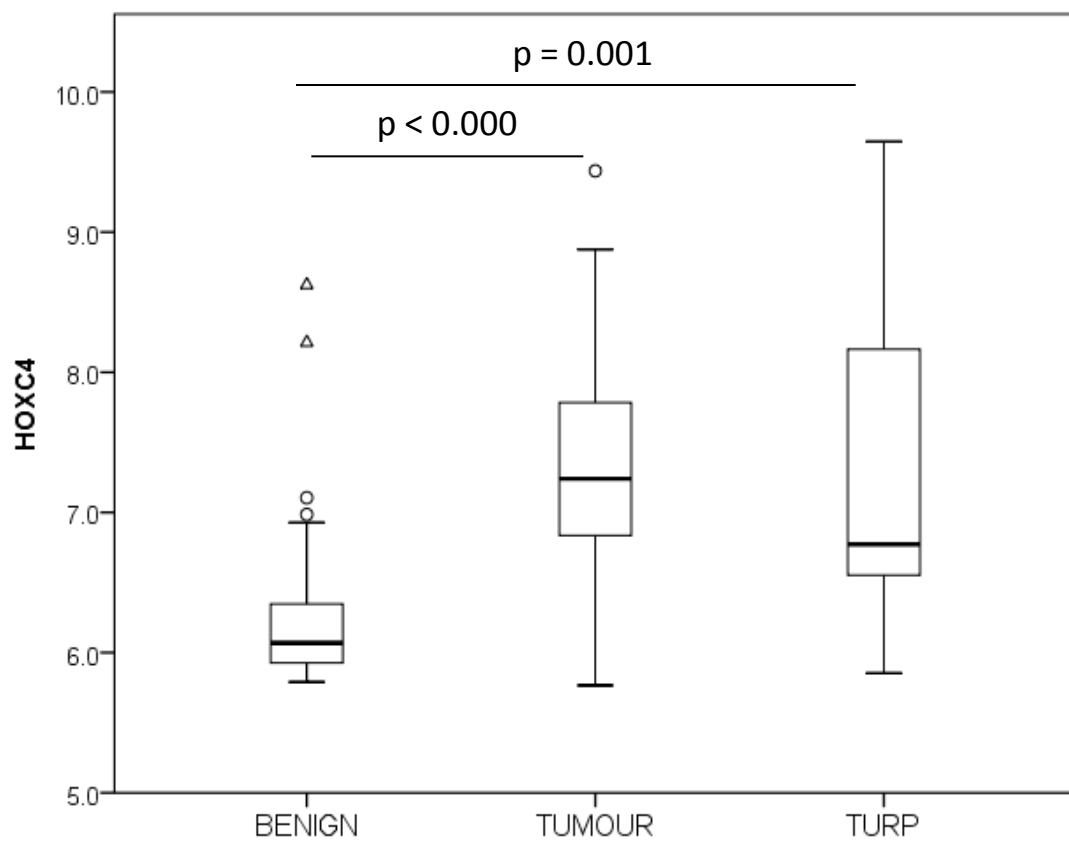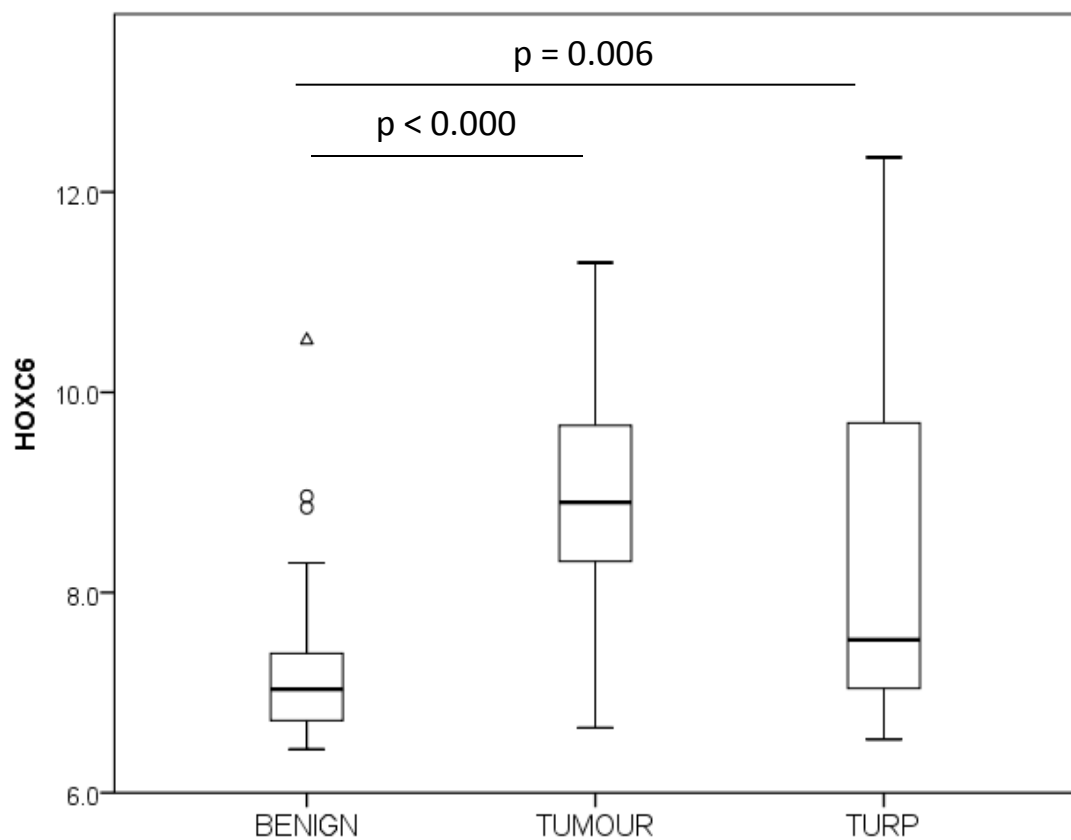

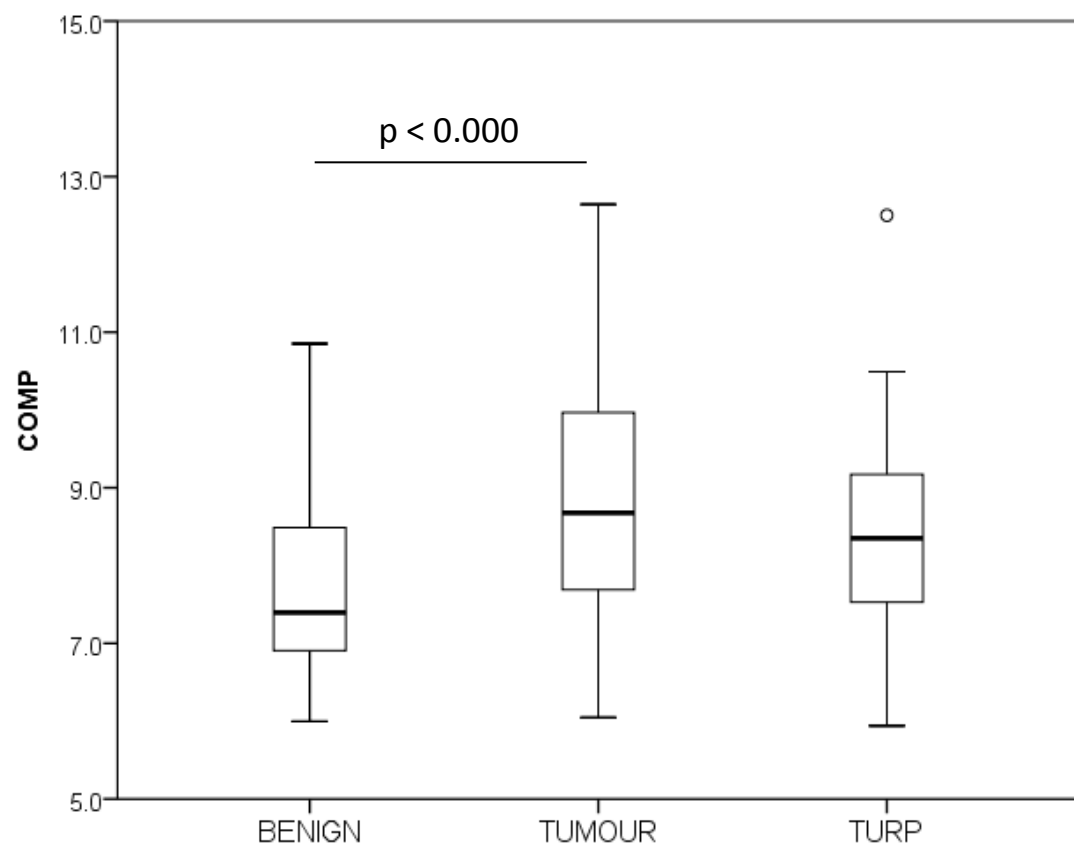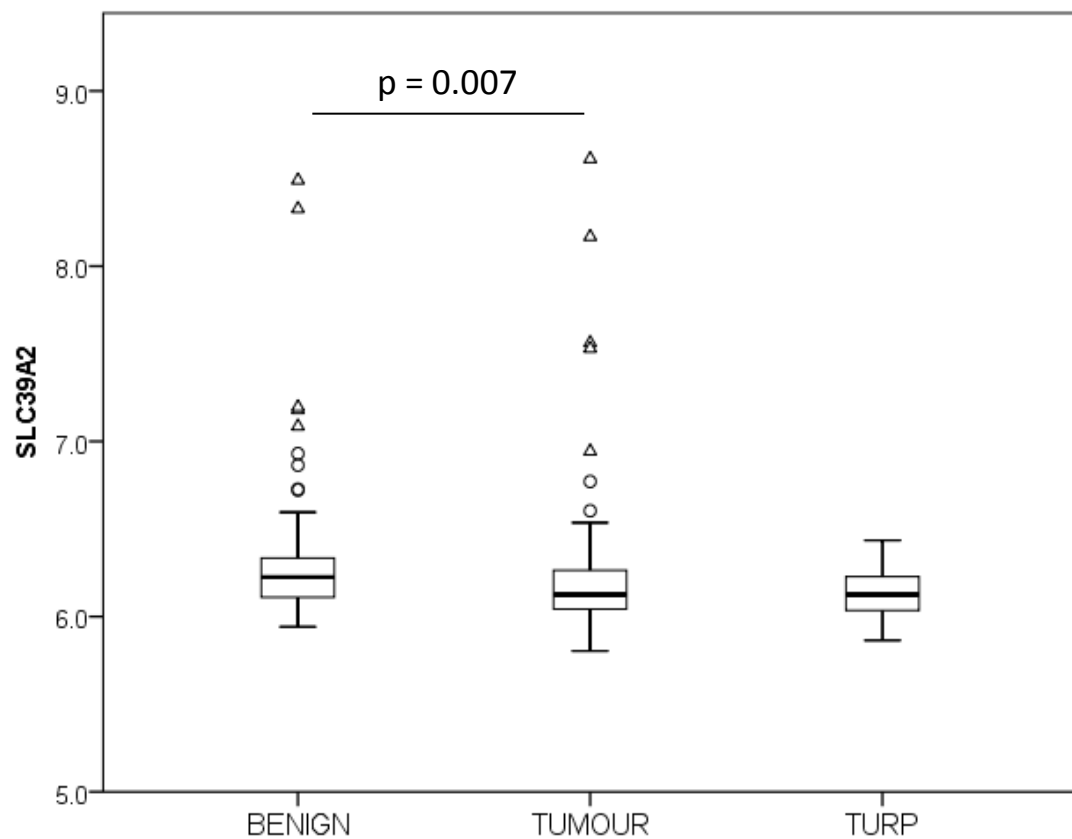

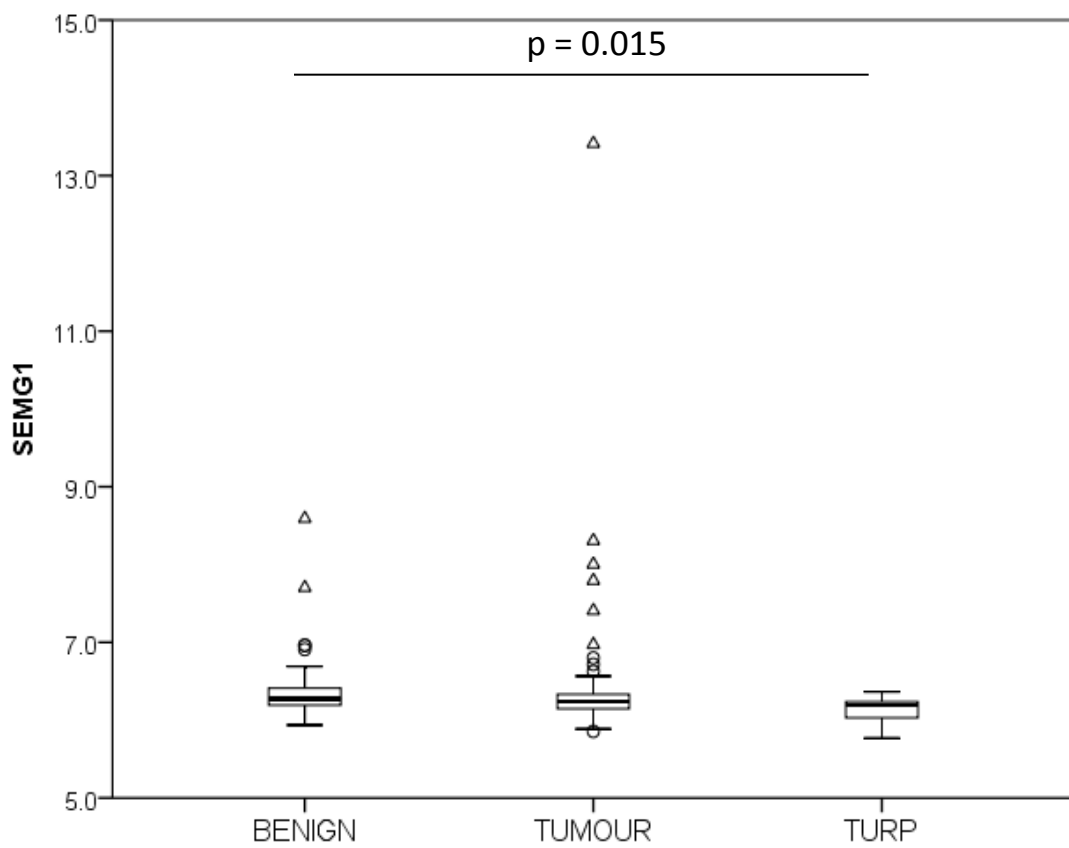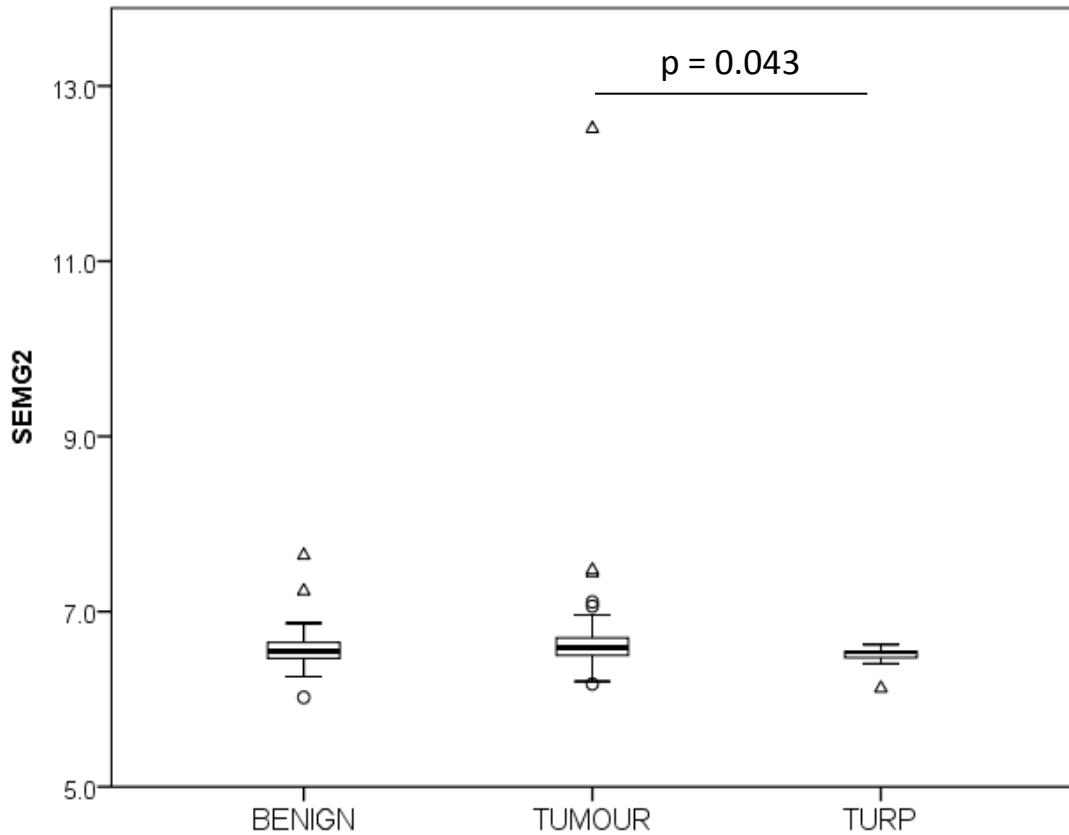

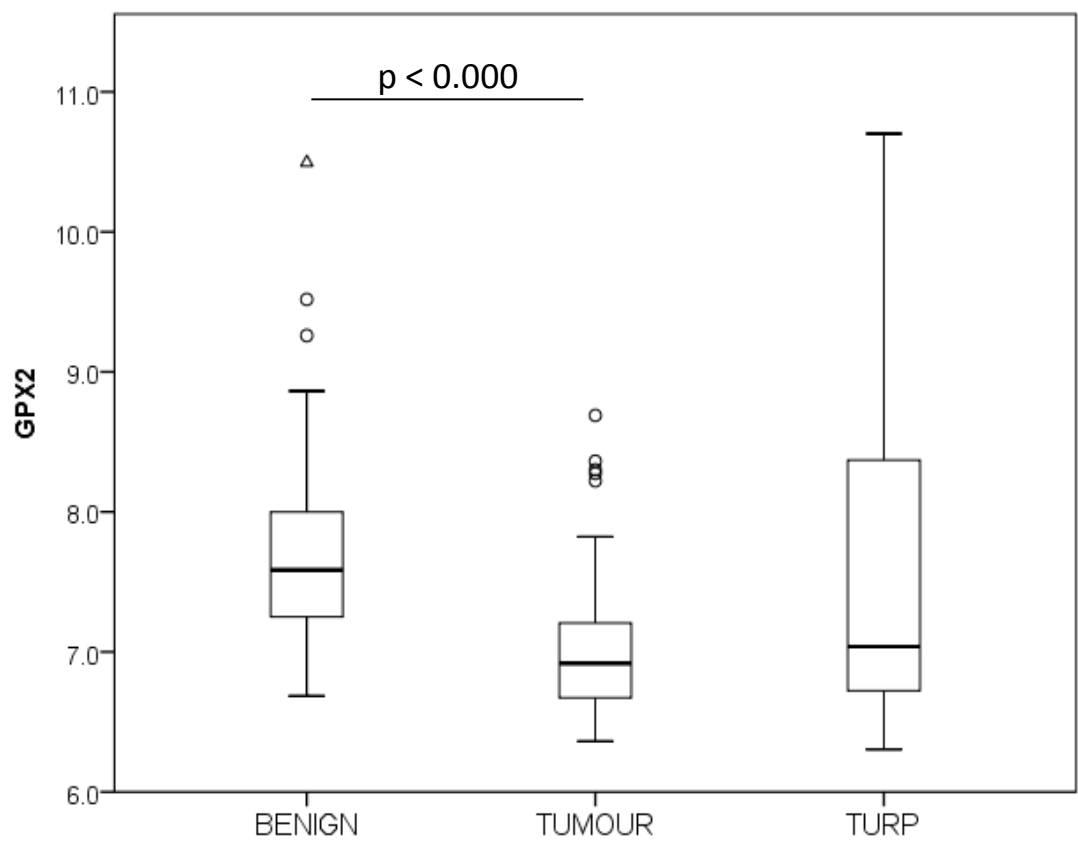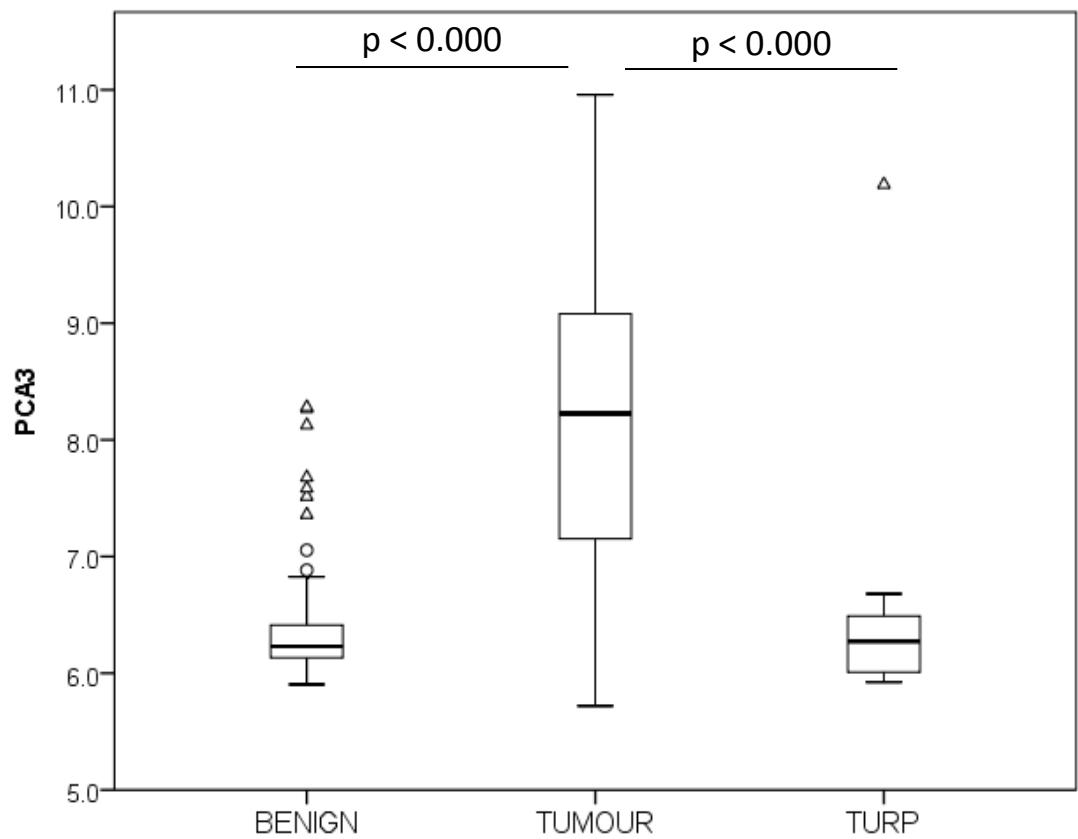

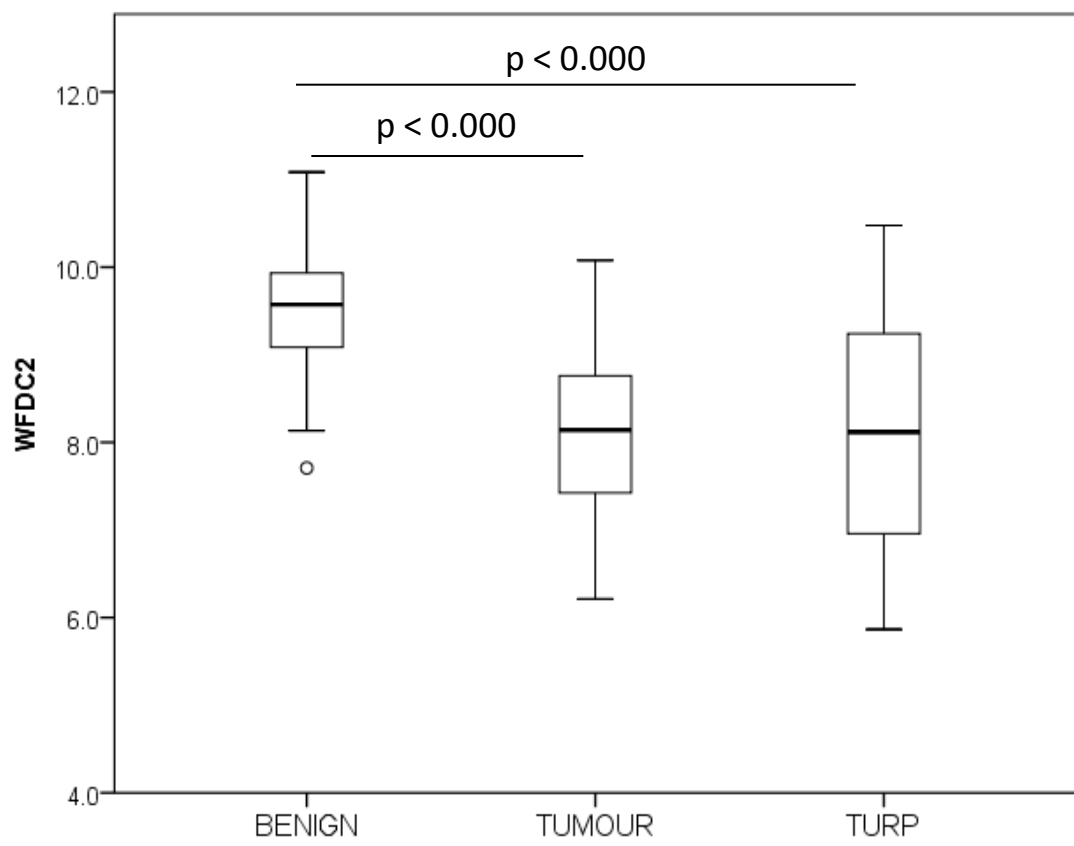

# Ross-Adams Dataset

## Summary of Results

| Gene     | Benign vs. RP | Benign vs. TURP | RP vs. TURP |
|----------|---------------|-----------------|-------------|
|          | P             | P               | P           |
| OR51E2   | <0.000        |                 | <0.000      |
| SIM2     | <0.000        |                 |             |
| ACTC1    | <0.000        | <0.000          |             |
| HPN      | <0.000        |                 | <0.000      |
| SLC45A2  | <0.000        |                 | 0.003       |
| TDRD1    | 0.028         |                 | 0.001       |
| AMARC    | <0.000        |                 | <0.000      |
| DLX1     | <0.000        |                 | <0.000      |
| GSTM1    | <0.000        |                 |             |
| SERPINA5 | <0.000        |                 |             |
| HOXC4    | <0.000        | 0.001           |             |
| HOXC6    | <0.000        | 0.006           |             |
| COMP     | <0.000        |                 |             |
| SLC39A2  | 0.007         |                 |             |
| SEMG1    |               | 0.015           |             |
| SEMG2    |               |                 | 0.043       |
| GPX2     | <0.000        |                 |             |
| PCA3     | <0.000        |                 | <0.000      |
| WFDC2    | <0.000        | <0.000          |             |

**Green:** Upregulation (e.g . High in primary vs. Benign)

**Red:** Downregulation (e.g . Low in primary vs. Benign)

## 3- Taylor dataset

Benign vs. primary tumours vs.  
diverse metastases

Statistics: Kruskal-Wallis test  
with Bonferroni correction for  
multiple tests

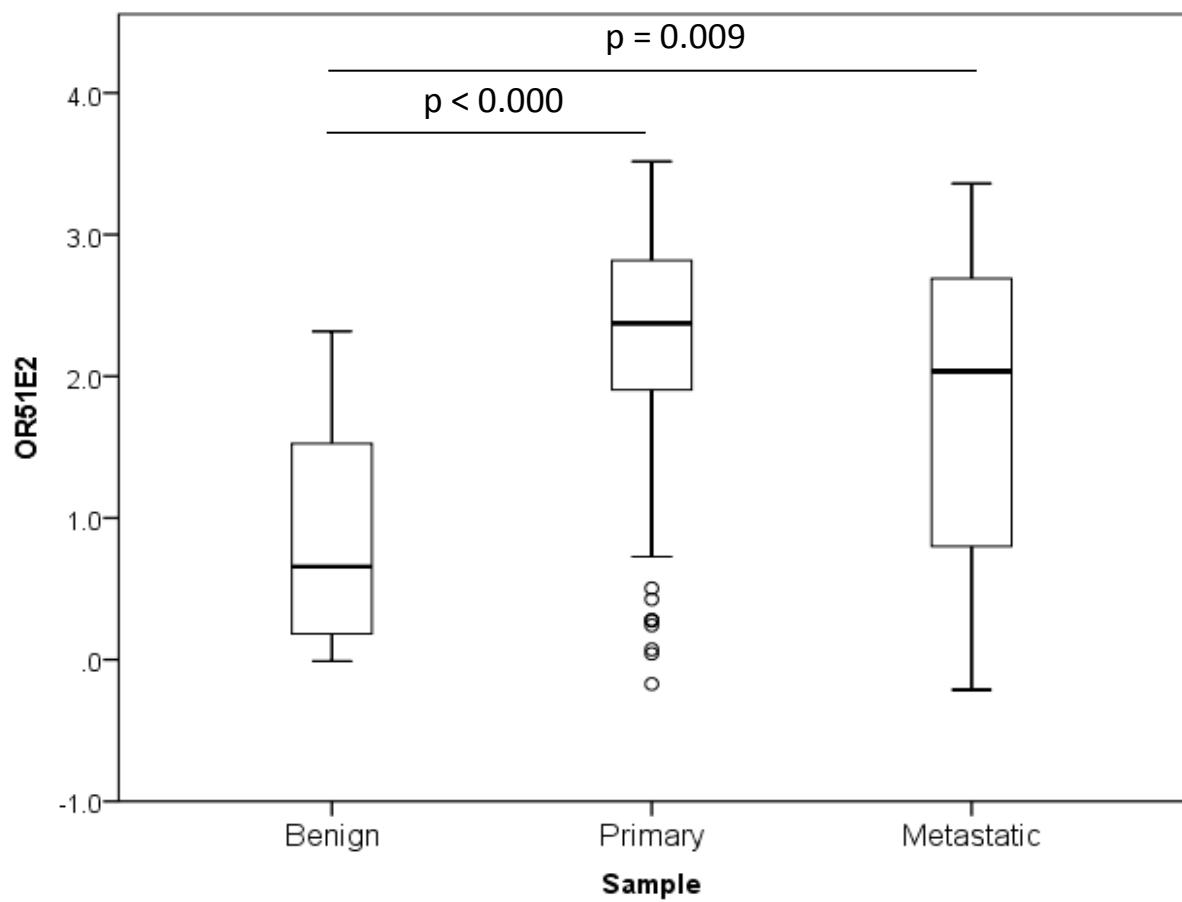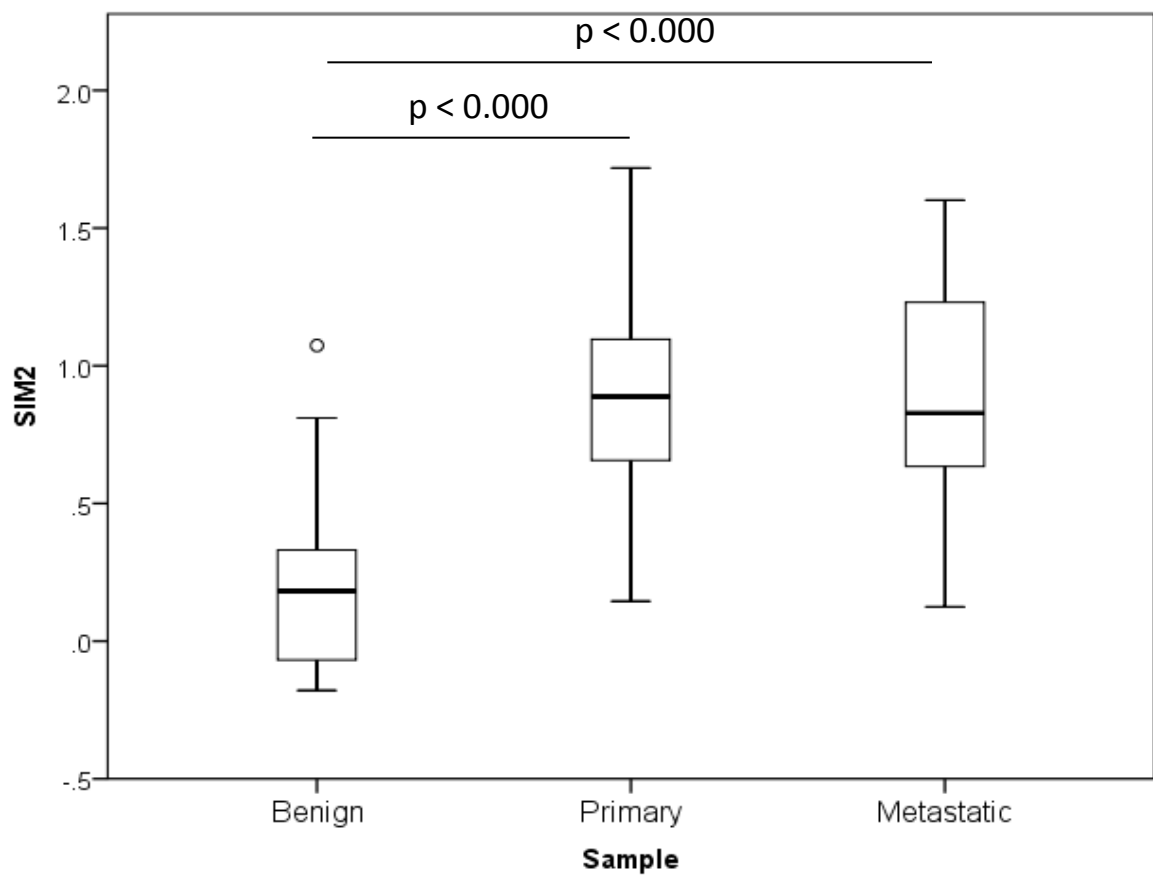



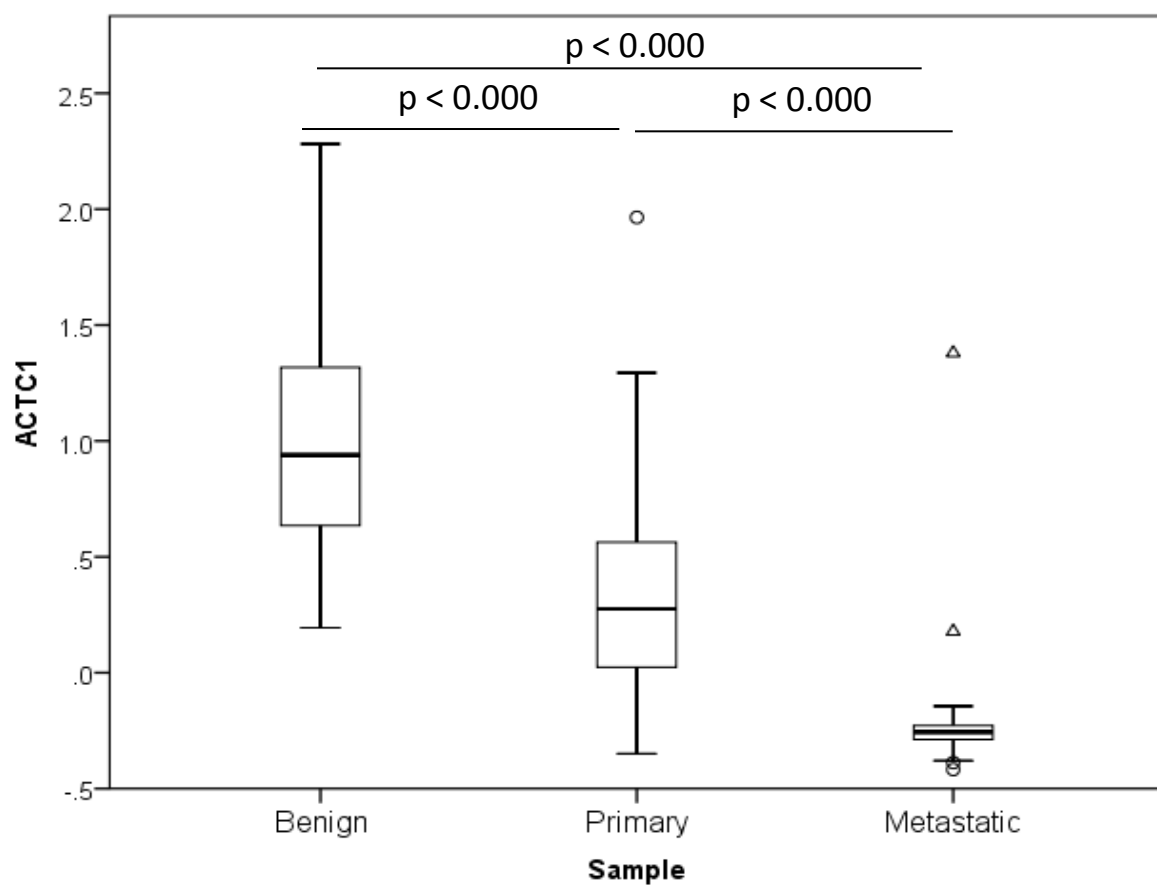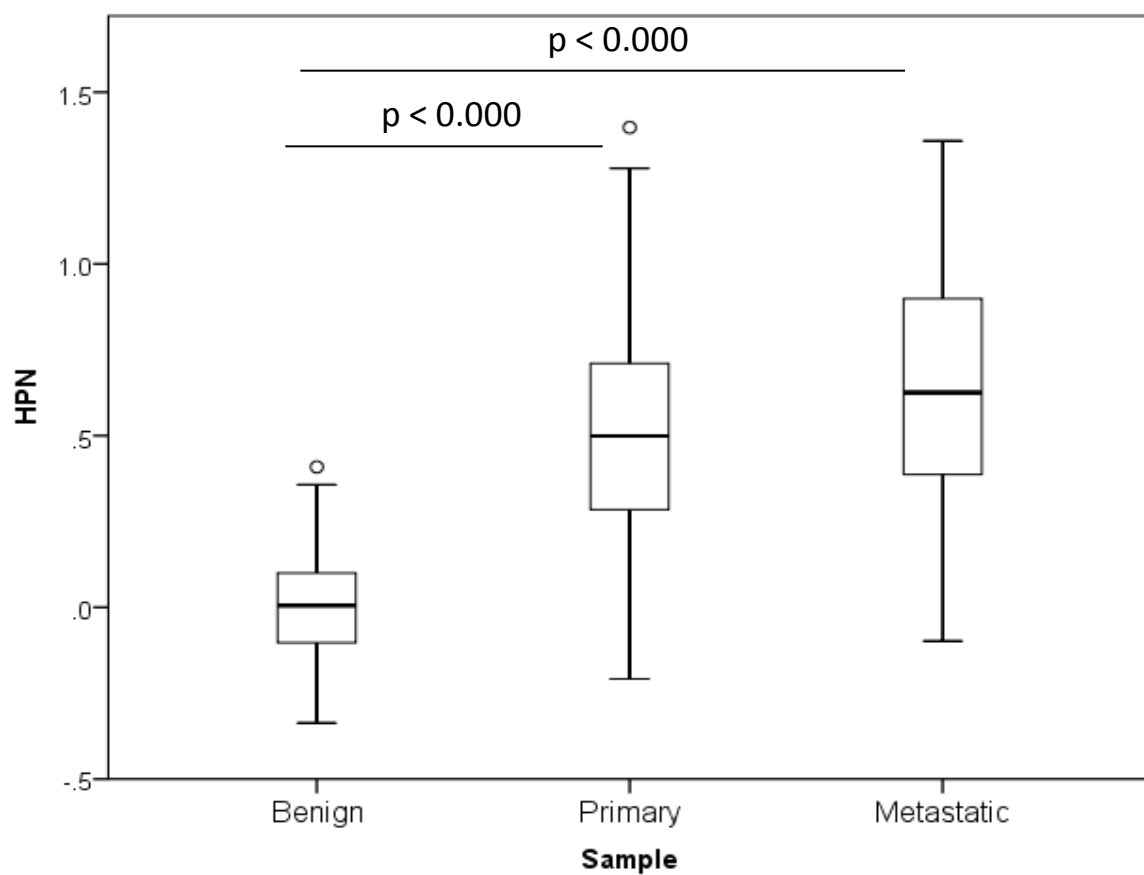

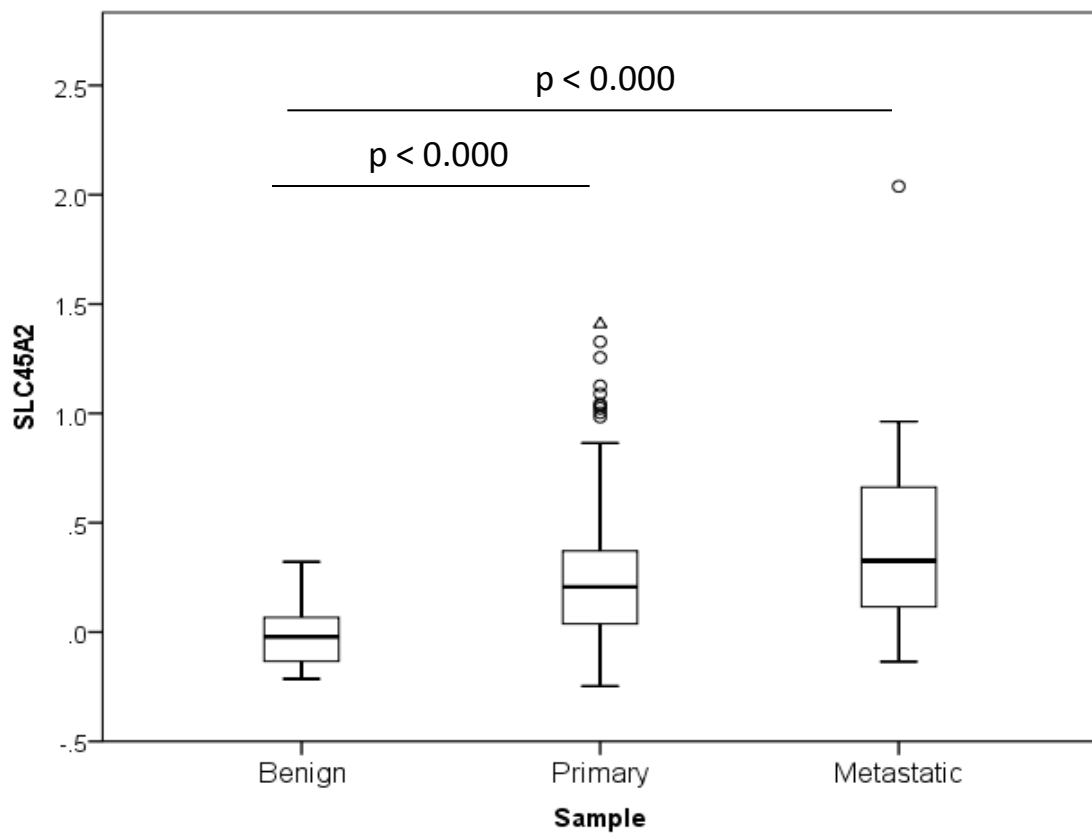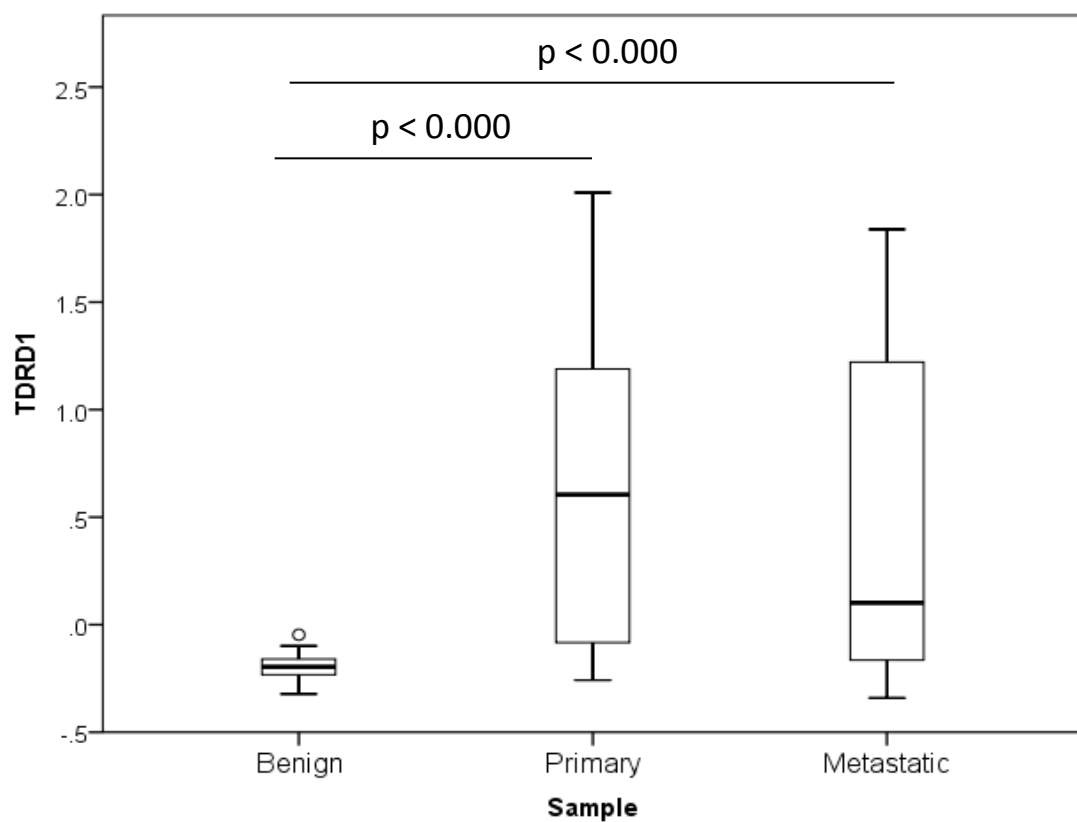

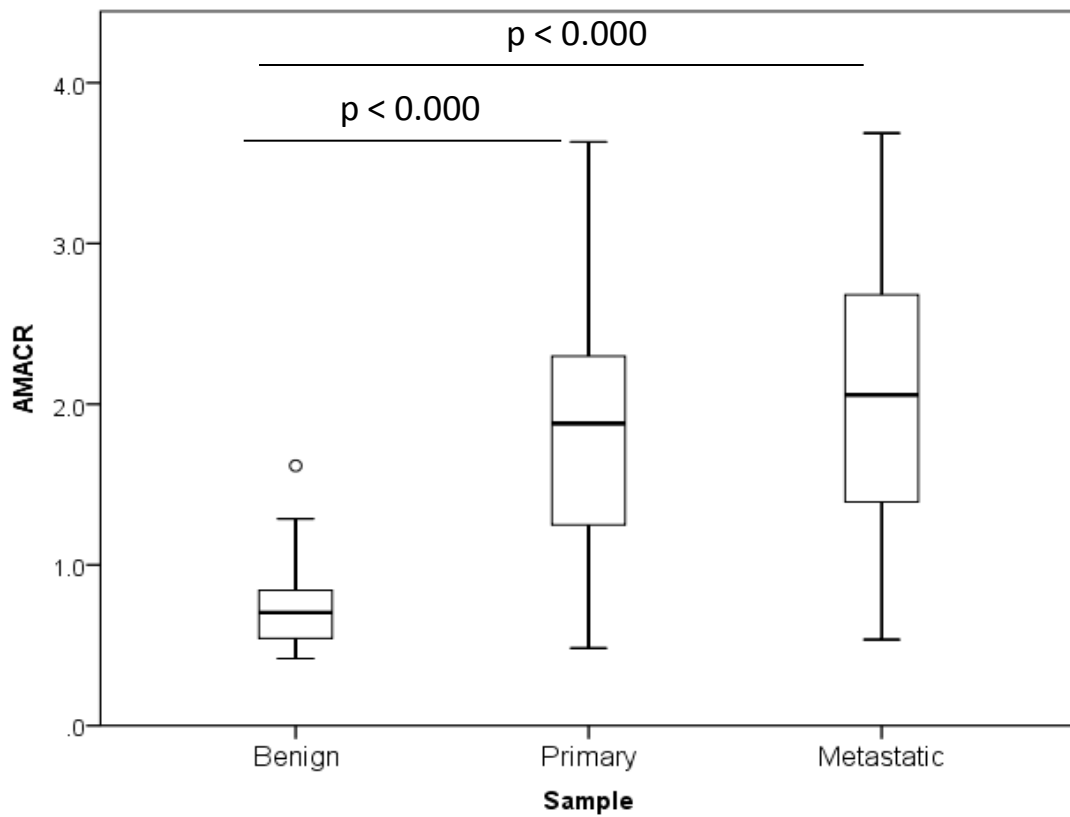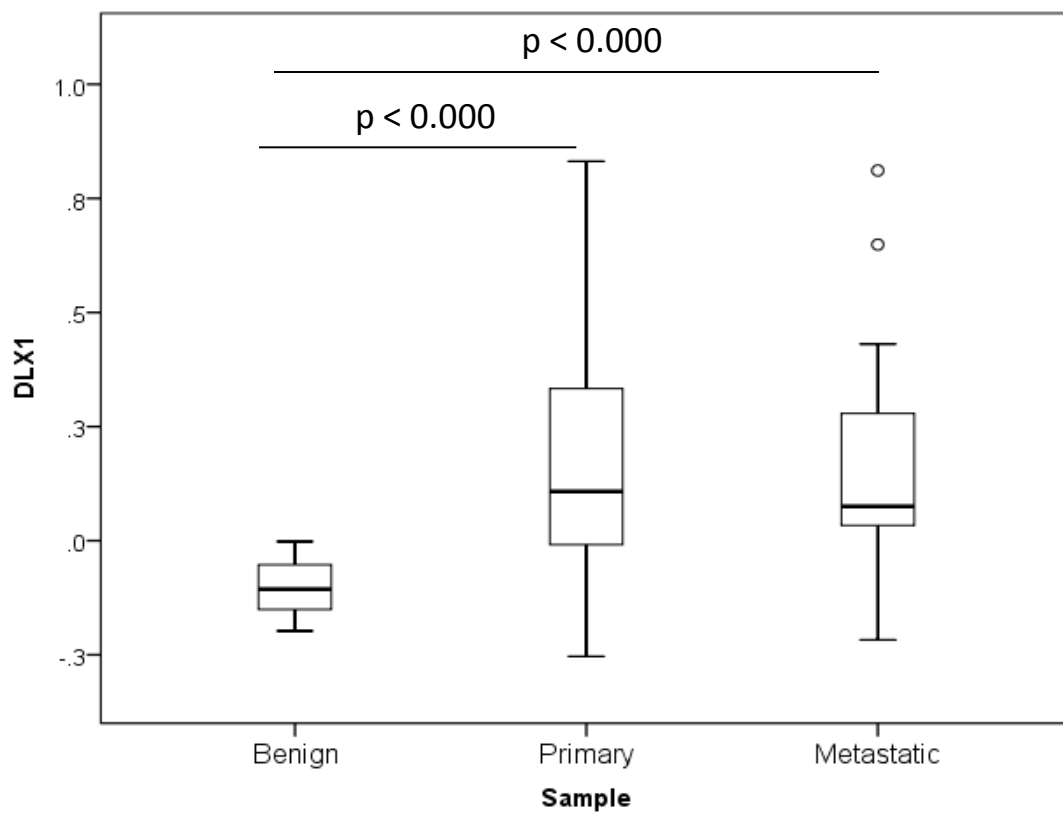

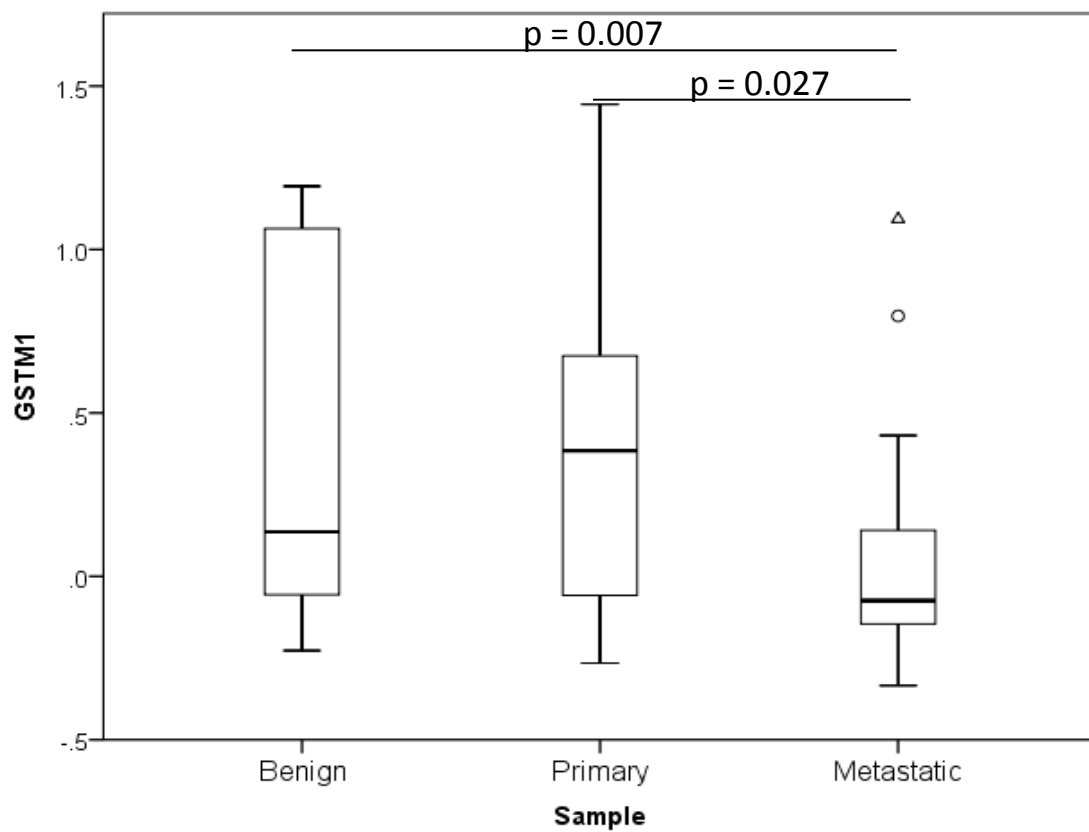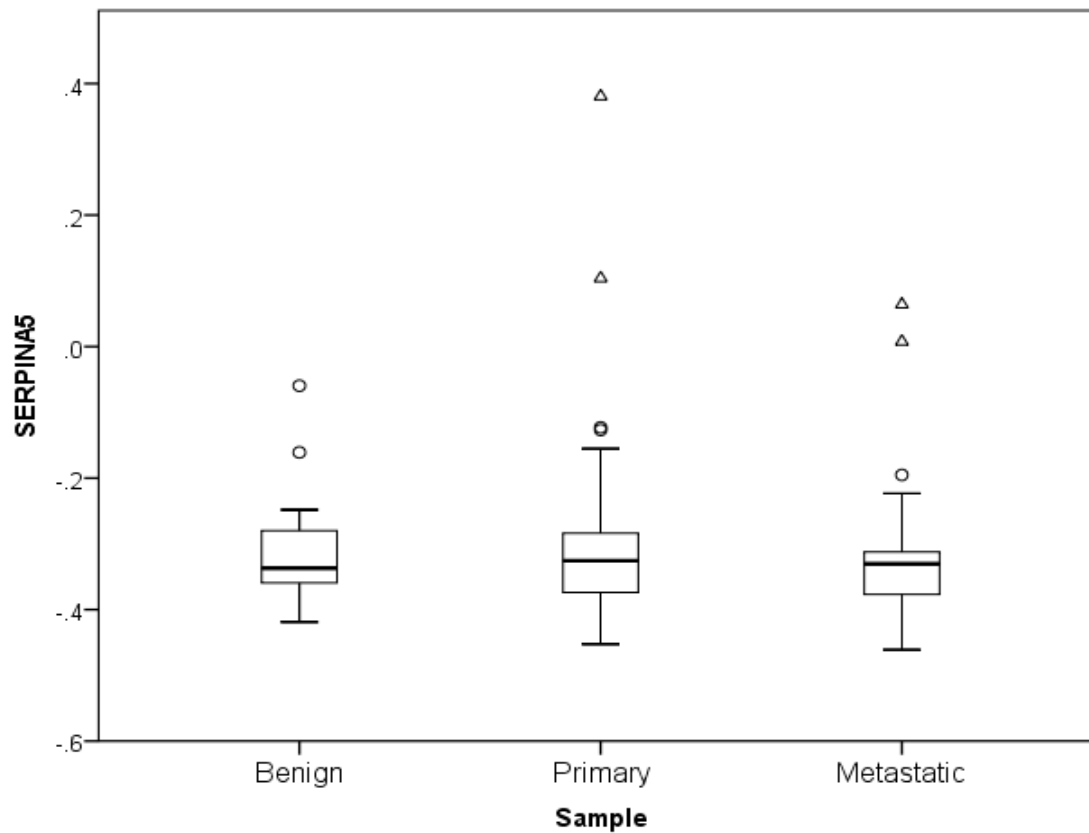

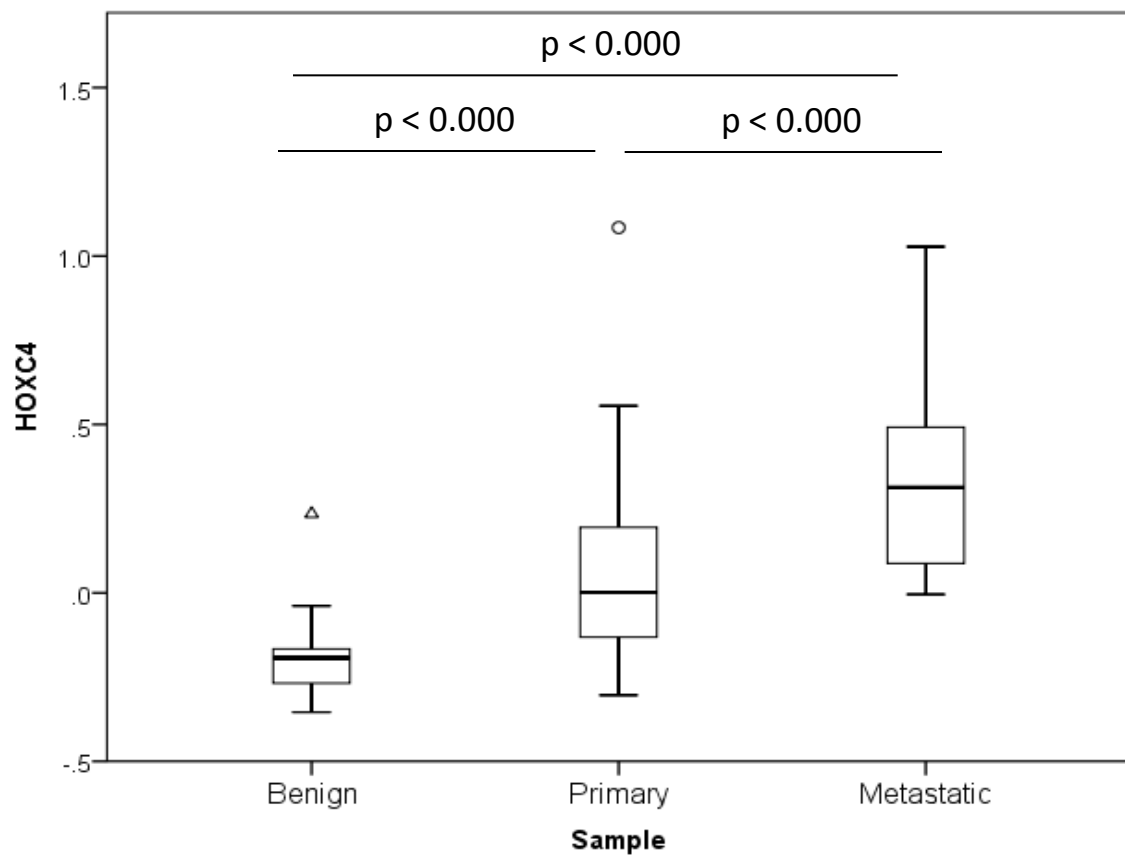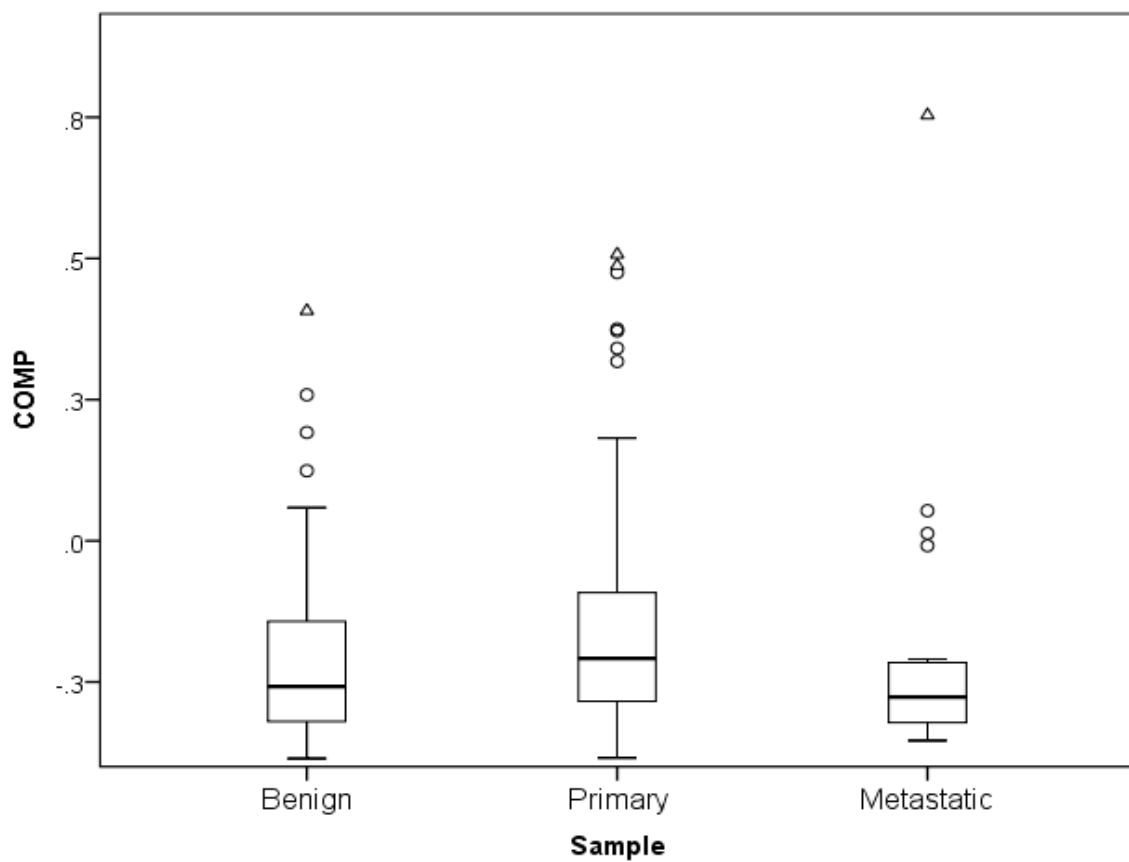

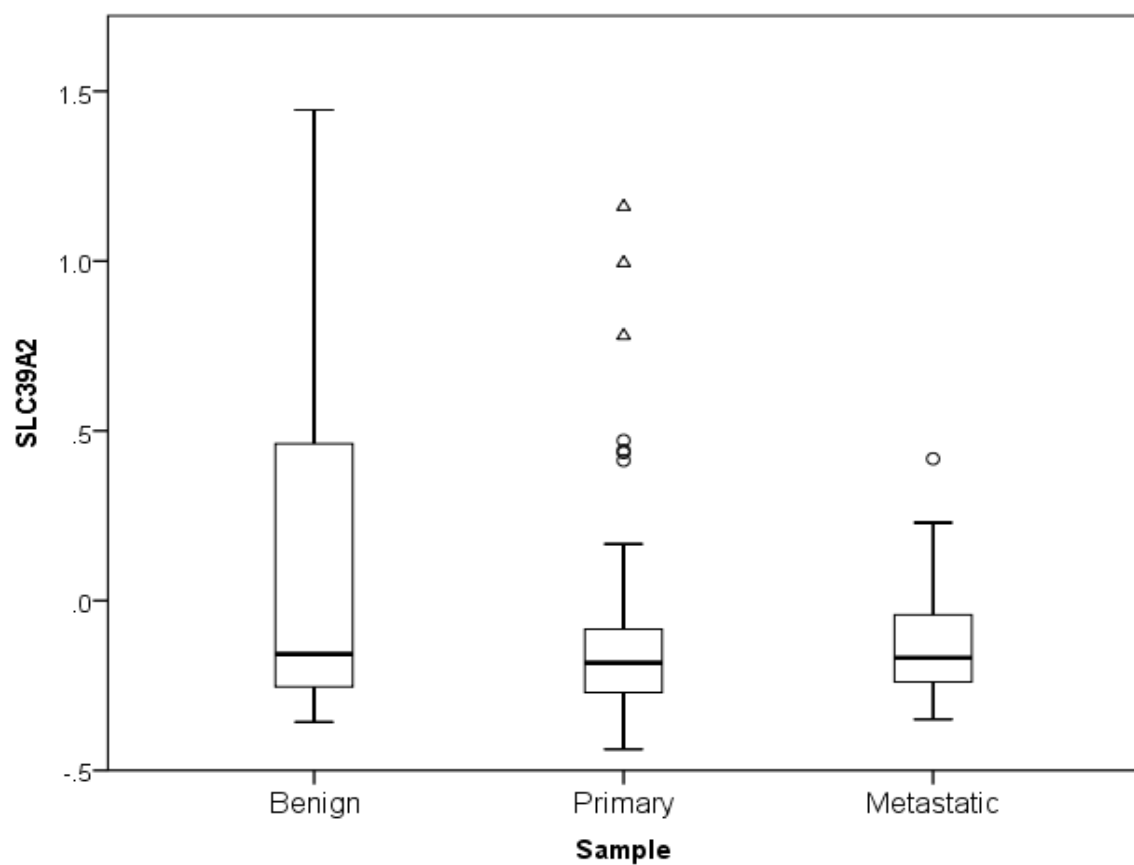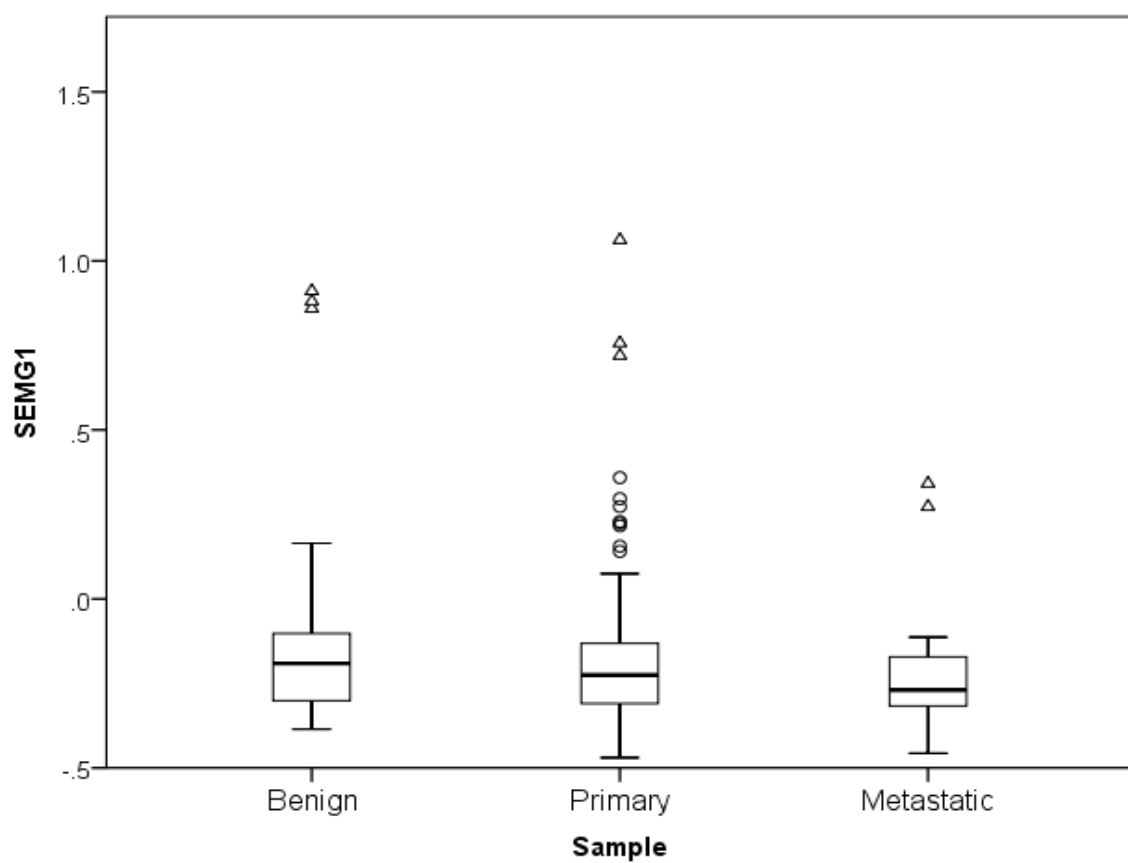

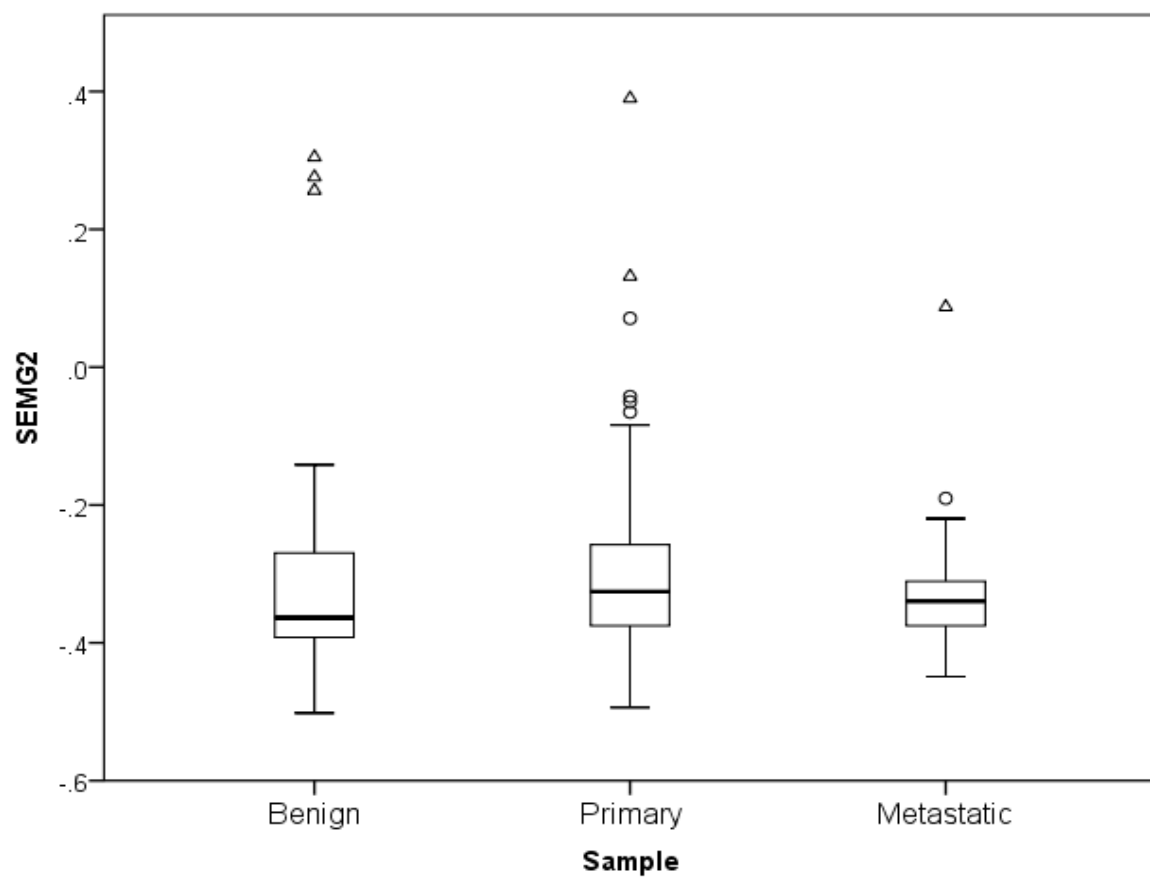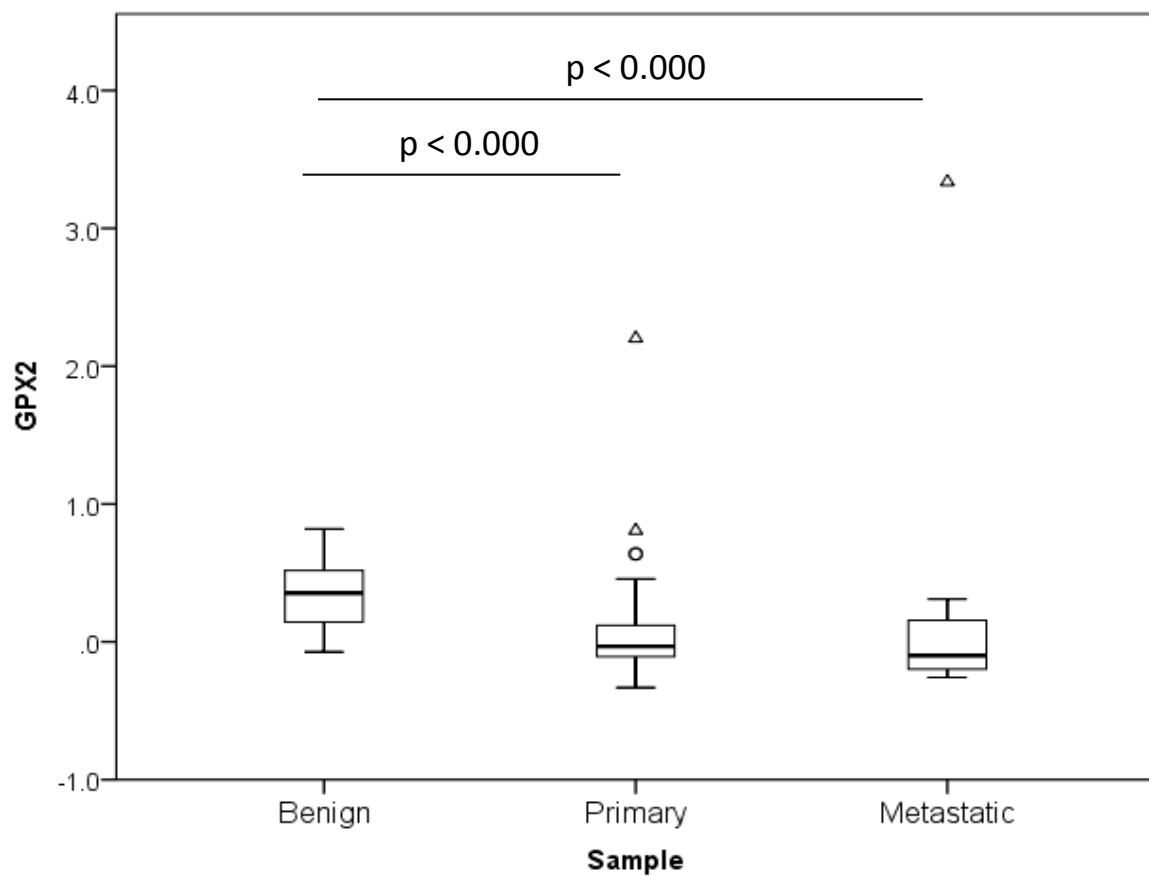

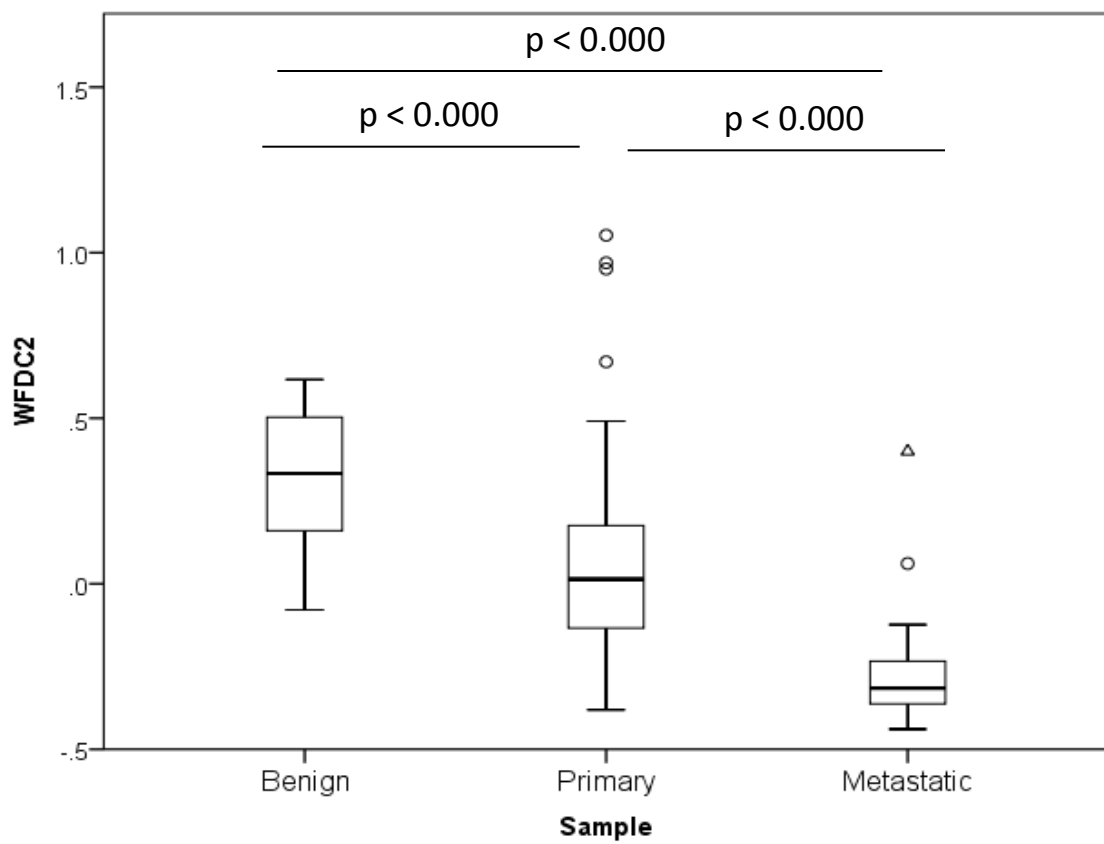



# Taylor Dataset

## Summary of Results

| P values | Benign vs. Primary | Benign vs. Metastases | Primary vs. Metastases |
|----------|--------------------|-----------------------|------------------------|
| ORE51E2  | 0.009              | < 0.000               |                        |
| SIM2     | < 0.000            | < 0.000               |                        |
| ACTC1    | < 0.000            | < 0.000               | < 0.000                |
| HPN      | < 0.000            | < 0.000               |                        |
| SLC45A2  | < 0.000            | < 0.000               |                        |
| TDRD1    | < 0.000            | < 0.000               |                        |
| AMARC    | < 0.000            | < 0.000               |                        |
| DLX1     | < 0.000            | < 0.000               |                        |
| GSTM1    |                    | 0.07                  | 0.027                  |
| SERPINA5 |                    |                       |                        |
| HOXC4    | < 0.000            | < 0.000               | < 0.000                |
| COMP     |                    |                       |                        |
| SLC39A2  |                    |                       |                        |
| SEMG1    |                    |                       |                        |
| SEMG2    |                    |                       |                        |
| GPX2     | < 0.000            | < 0.000               |                        |
| WFDC2    | < 0.000            | < 0.000               | < 0.000                |

Green: Upregulation (e.g . High in primary vs. Benign)

Red: Downregulation (e.g . Low in primary vs. Benign)

# Summary for genes listed

| Gene name | Lapointe | Ross-Adams | Taylor | Up vs. down* |
|-----------|----------|------------|--------|--------------|
| ORE51E2   | ✓        | ✓          | ✓      | Up           |
| SIM2      | ✓        | ✓          | ✓      | Up           |
| ACTC1     |          | ✓          | ✓      | Down         |
| HPN       | ✓        | ✓          | ✓      | Up           |
| SLC45A2   | ✓        | ✓          | ✓      | Up           |
| TDRD1     |          | ✓          | ✓      | Up           |
| AMARC     | ✓        | ✓          | ✓      | Up           |
| DLX1      |          | ✓          | ✓      | Up           |
| GSTM1     |          | ✓          | X      | Down         |
| SERPINA5  | ✓        | ✓          | X      | Down         |
| HOXC4     | ✓        | ✓          | ✓      | Up           |
| HOXC6     |          | ✓          |        | Up           |
| COMP      | X        | ✓          | X      | Up           |
| SLC39A2   | ✓        | ✓          | X      | Down         |
| SEMG1     | X        | X          | X      | ---          |
| SEMG2     | X        | X          | X      | ---          |
| GPX2      | ✓        | ✓          | ✓      | Down         |
| PCA3      | ✓        | ✓          |        | Up           |
| WFDC2     | ✓        | ✓          | ✓      | Down         |

**Green:** significant difference in expression between benign and primary tumours at p lower than 0.05; **Red:** no significant difference; **Black:** not available.\* Consistant up vs. down-regulation in primary tumours vs. benign
