# Supplementary figures and images for: Principal Component Analysis of RNA-seq Data Unveils a Novel Prostate Cancer-Associated Gene Expression Signature
Source: Preprints.org preprint supplement (doi:10.20944/preprints202102.0234.v1), 2021-02-09

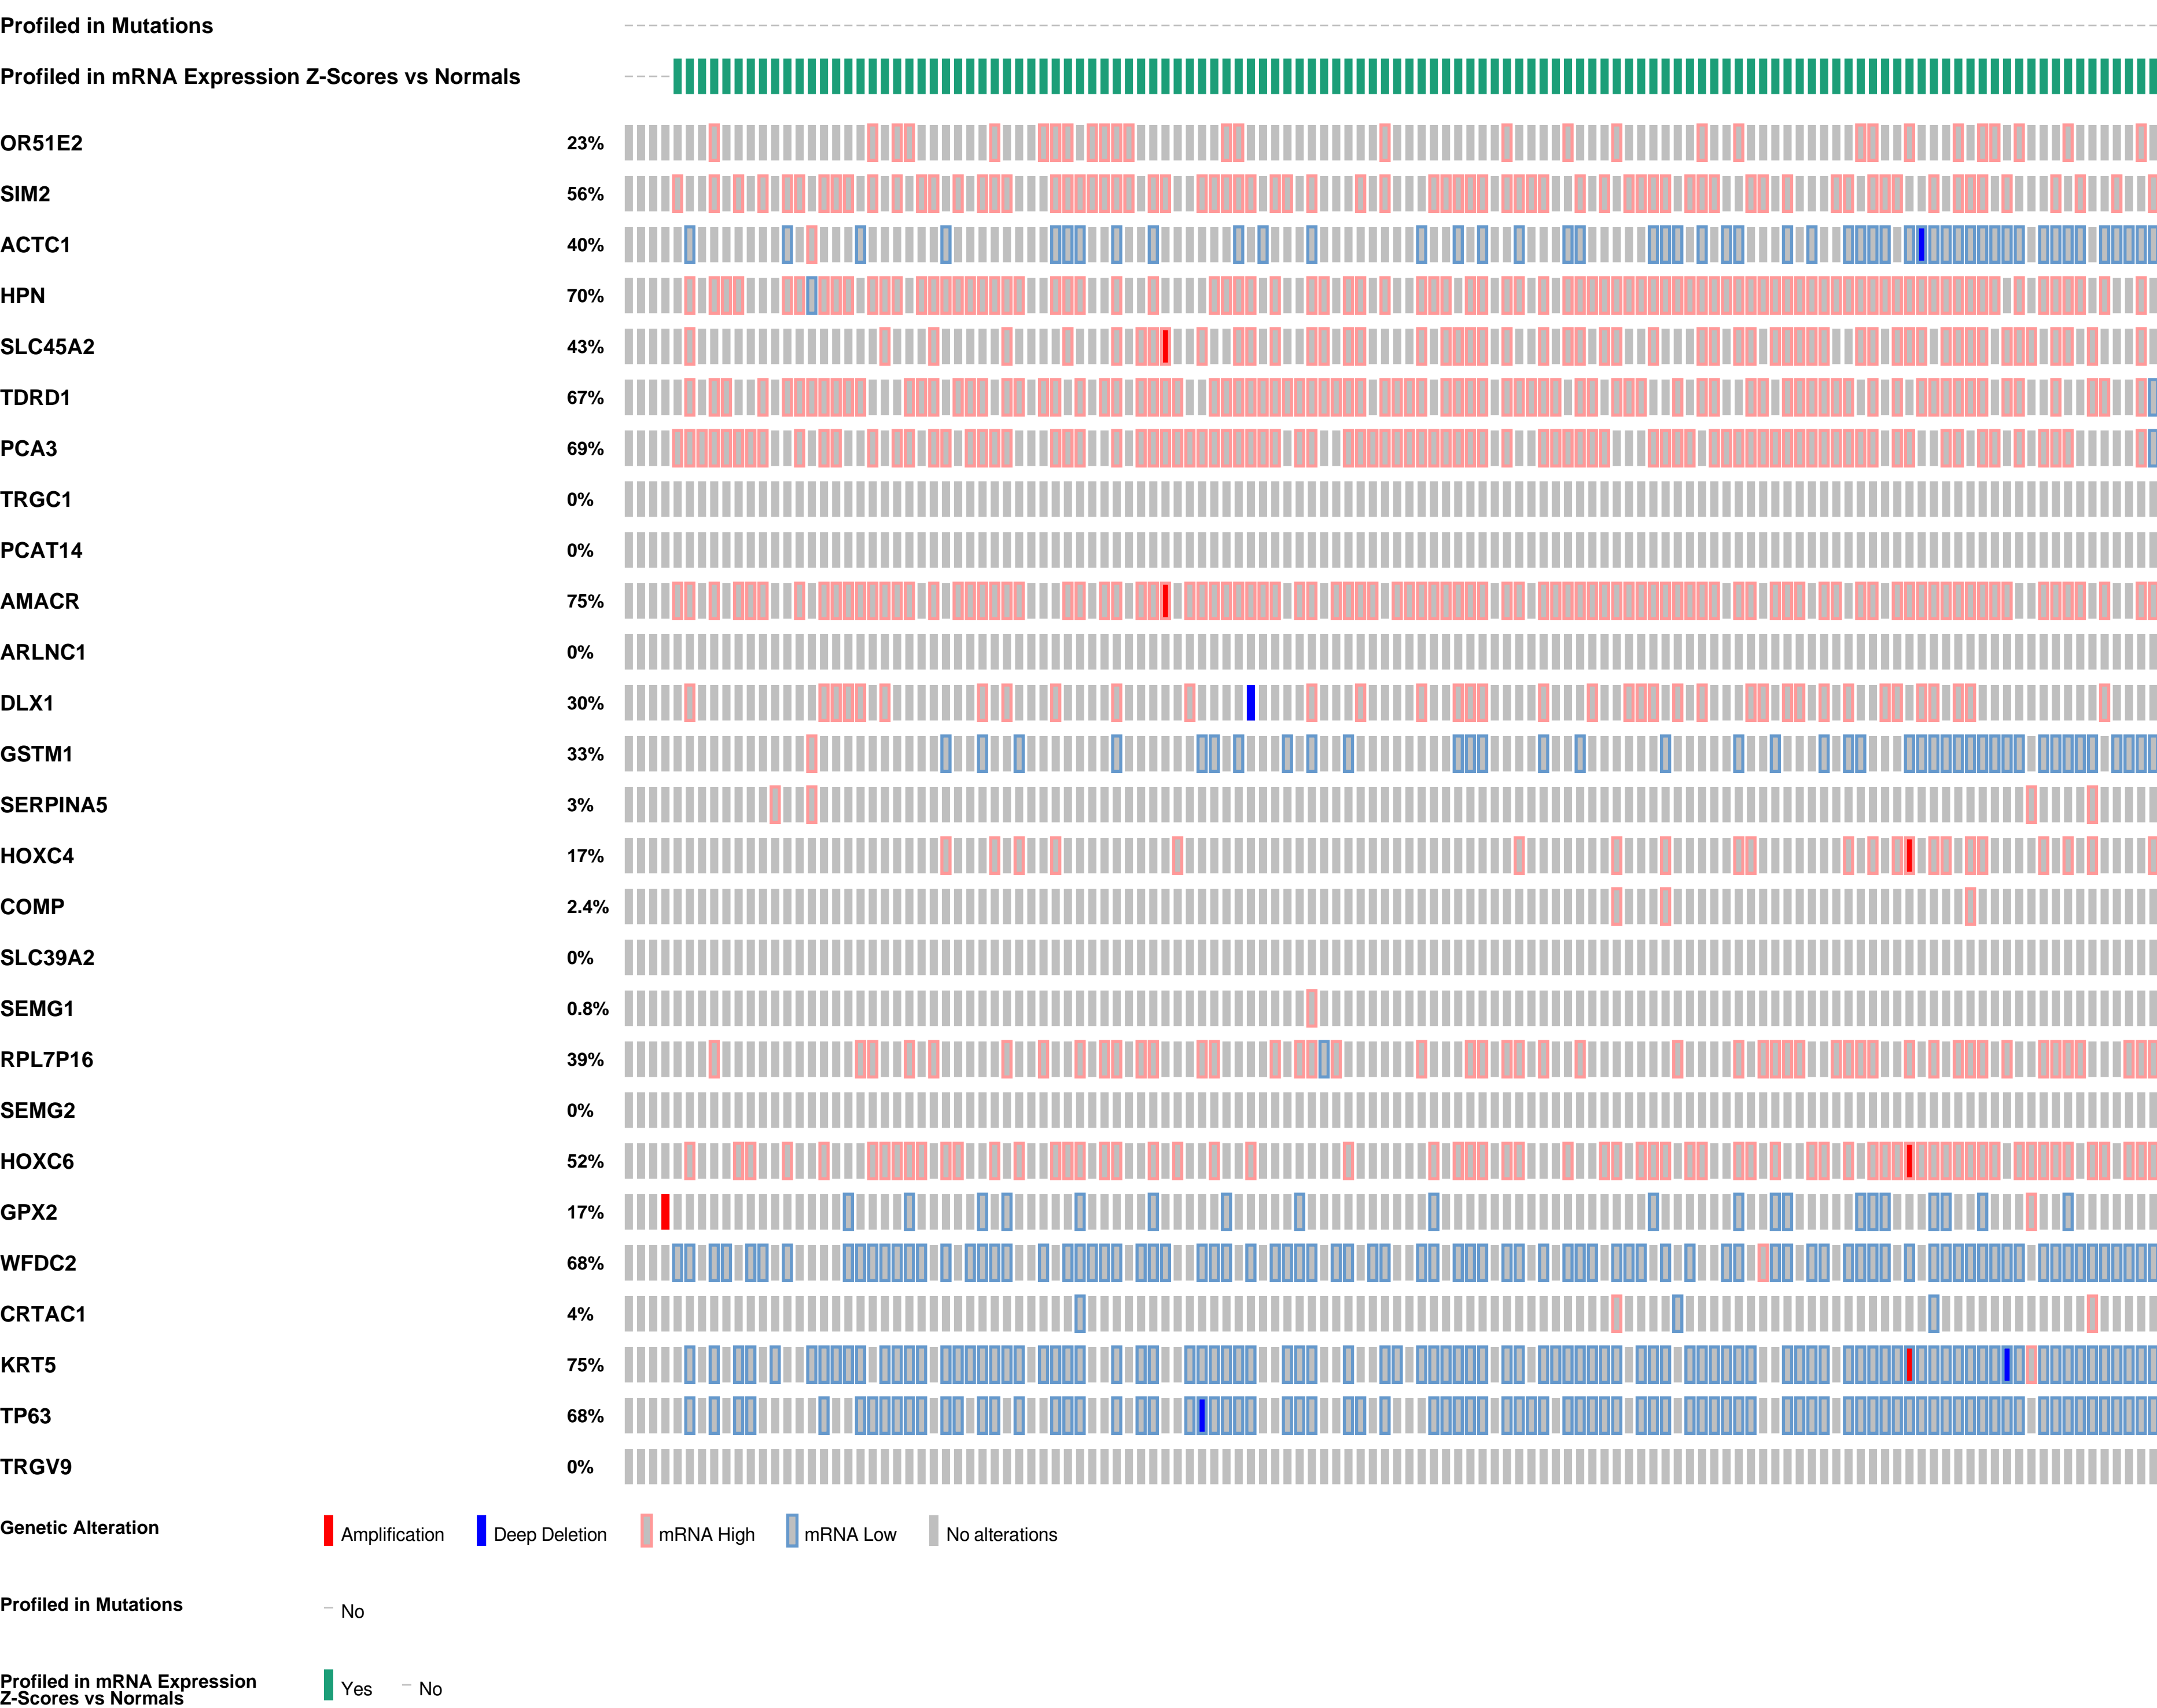

Supplement: Supplementary file 1 [file Supplementary Fig 3.pdf › Supplementary Fig 3.pdf]
